# Supplementary material for: Floor plate-derived neuropilin-2 functions as a secreted semaphorin sink to facilitate commissural axon midline crossing
Source: PubMed Central journal article supplement — Genes Dev. 2015 Dec 15;29(24):2617–32. doi: 10.1101/gad.268086.115 (PMC4699389; doi:10.1101/gad.268086.115), 2015-12-15

## Supplemental Materials

Supplemental Table and Figure Legends

### Supplemental Table 1

Summary of the quantifications for normalized immunofluorescence, ventral commissure, ventral funiculus, lateral funiculus thickness taken from all genetically altered mouse lines and their respective controls analyzed in this study. Values are represented as the means  $\pm$ SEM from 5-8 sections and average among 4-5 animals/genotype.

**Supplemental Figure 1.** Specific Plexin-A1 protein is localized to dorsal spinal commissural neurons.

**(A)** A wild type (top row) and a *Plexin-A1*<sup>-/-</sup> (bottom row) transverse section from E11.5 mouse spinal cords co-labeled with antibodies that recognized a peptide corresponding to human (h)Plexin-A1 aa 182-200 (green; Abcam) and TAG1 (red) in commissural axons. **(B)** A *Plexin-A1*<sup>-/-</sup> spinal cord section at E11.5 co-labeled using antibodies against the most c-terminus 16 aa of mouse (m)Plexin-A1 (Yoshida et al., 2006) and TAG1 (red). Scale bar in A = 160  $\mu$ m for both A and B. **(C-D)** Open-book spinal cord preparations of E11.5 mouse spinal cords taken from *Nrp2*<sup>f/f</sup>;*FoxA2*<sup>+/-creERT2</sup> embryos treated with tamoxifen (+TM)**(C)** or no TM **(D)**. Sections were processed by immunohistochemistry with anti-Nrp2 and anti-hPlxnA1. White arrows point to overlapping regions of the pre-crossing axons expressing PlxnA1 and Nrp2. FP, floor plate. Scale Bar, 50  $\mu$ m in D for C and D.

**Supplemental Figure 2.** Post-crossing axons are sensitive to both Sema3B and Sema3F inhibition in vitro.

**(A)** Schematic diagram illustrating how post-crossing axon versus pre-crossing axon spinal cord explants are isolated. Representative micrograph illustrating an entire post-crossing axon spinal cord explant with neurite growing out from the ventral side, with the floor plate attached. **(B)** Representative images of spinal cord explants, on the ventral side, illustrating post-crossing axons treated with increasing Sema3B ligand concentrations. Three independent explant cultures are shown. **(C)** Spinal cord explants containing post-crossing axons treated with either Sema3F or Sema3A at 1.0 $\mu$ g/ml. **(D)** Quantification of the mean neurite length taken from the explants treated with different Sema3 ligands and concentrations. N=4 independent explant cultures per ligand treatment condition; One-way ANOVA, post-hoc Tukey test, \* $p < 0.05$ ; \*\* $p < 0.01$ ; \*\*\* $p < 0.001$ . Statistical significance was also found between the following groups:  $p < 0.05$  for Sema3B 0.5 $\mu$ g/ml,  $p < 0.01$  for Sema3B 1.0 $\mu$ g/ml, and  $p < 0.001$  for Sema3B 2 $\mu$ g/ml compared to Sema3B 0.25 $\mu$ g/ml;  $p < 0.001$  for Sema3B concentrations 0.05, 1.0 and 2.0 $\mu$ g/ml compared to Sema3A 1.0 $\mu$ g/ml;  $p < 0.05$  for Sema3F 1.0 $\mu$ g/ml compared to Sema3A 1.0 $\mu$ g/ml.

**Supplemental Figure 3.** Specific deletion of floor plate derived-Neuropilin-2 in *Nrp2<sup>fl/fl</sup>;FoxA2<sup>creERT2/creERT2</sup>* mouse embryos show pre-crossing guidance defects in Nrp2- and TAG1-positive axons.

**(A-B)** Representative confocal images of E11.5 mouse spinal cord sections taken from a *Nrp2<sup>fl/fl</sup>;FoxA2<sup>-+/creERT2</sup>* embryo with no tamoxifen (No TM) treatment **(A)** and

*Nrp2<sup>ff/f</sup>;FoxA2<sup>creERT2/creERT2</sup>* embryo with tamoxifen (+TM) treatment **(B)**. Transverse sections were processed for immunohistochemistry using antibodies against TAG1 (red), Nrp2 (blue) and GFP (green). Scale bar, 160  $\mu$ m in B for A and B. **(C-D)** Representative confocal images of E11.5 mouse spinal cord open-book preparations taken from an *Nrp2<sup>ff/f</sup>;FoxA2<sup>+/+</sup>* (no cre), +TM **(C)** or *Nrp2<sup>ff/f</sup>;FoxA2<sup>+/CreERT2</sup>*, +TM embryo **(D)**. The open-book was processed with anti-GFP (top panels) and anti-Nrp2 (bottom panels). GFP signal in the floor plate region indicates successful Cre mediate recombination in the *Nrp2<sup>ff/f</sup>;FoxA2<sup>+/CreERT2</sup>*, +TM animal. While the ventral commissure in the *Nrp2<sup>ff/f</sup>;FoxA2<sup>+/CreERT2</sup>*, +TM mutant appeared to contain fewer Nrp2-positive axons, similar Nrp2 fluorescent intensity was detected in the dorsal spinal cord, where the cell bodies of the commissural neurons are located, as indicated by the white dashed lines between the mutant and control. Scale bar, 50  $\mu$ m in D for C and D.

**Supplemental Figure 4.** Deletion of floor plate-derived Neuropilin 2 does not alter the number of apoptotic cells or the cellular architecture of the mouse developing spinal cord in vivo.

Representative confocal images of E11.5 mouse spinal cords taken from *Nrp2<sup>ff/f</sup>;FoxA2<sup>+/creERT2</sup>* and *Nrp2<sup>ff/f</sup>;FoxA2<sup>creERT2/creERT2</sup>* embryos treated with tamoxifen (+TM) or without tamoxifen (No TM). TUNEL assay revealed no observable differences in the number of apoptotic cells between *Nrp2<sup>ff/f</sup>;FoxA2<sup>+/creERT2</sup>* and *Nrp2<sup>ff/f</sup>;FoxA2<sup>creERT2/creERT2</sup>* embryos treated with or without tamoxifen. Note, fluorescent signal detected in the floor plate is the endogenous GFP signal from only

animals treated with TM, indicated successful Cre mediate recombination specific to the floor plate cells. Positive control spinal cord section was treated with DNase I to induce DNA fragmentation. Scale bar, 50  $\mu\text{m}$ .

**Supplemental Figure 5.** Specific deletion of floor plate derived-Neuropilin-2 altered pre-crossing axon pathfinding in ventral GABAergic commissural neurons. **(A-B)** Representative confocal images of E11.5 mouse spinal cord sections from a *Nrp2<sup>f/f</sup>;FoxA2<sup>+creERT2</sup>* embryo with no tamoxifen (No TM) treatment **(A)** and *Nrp2<sup>f/f</sup>;FoxA2<sup>+creERT2</sup>* embryo with tamoxifen (+TM) treatment **(B)** processed for immunohistochemistry for GAD65 (blue), Nrp2 (red) and GFP (green). White arrows and white arrowheads point to GAD65+ and Nrp2+ axons, respectively. FP, floor plate. Scale bar for A and B left columns (low magnification), 160  $\mu\text{m}$ ; A and B right columns (high magnification), 80  $\mu\text{m}$ . **(C)** Quantifications of GAD65 normalized fluorescence from *Nrp2<sup>f/f</sup>;FoxA2<sup>+creERT2</sup>* No TM and *Nrp2<sup>f/f</sup>;FoxA2<sup>+creERT2</sup>* +TM embryos. Data are means  $\pm$  SEM from 5-8 sections per embryo, where n=3 embryos per genotype; Student's *t*-test; \*p<0.05. **(D)** Schematic diagram illustrating the parameters for the measurement of the normalized ventral and lateral funiculi. Measurements for the ventral funiculus (VF) and lateral funiculus (LF) are taken as indicated by the 'red bars' and normalized to the entire length of the dorsoventral axis of the spinal cord sections. The black diagonal and horizontal lines form a 45 degrees angle that demarcates the VF and LF. Similar measurement was performed for the ventral commissure (VC) normalized thickness. **(E)** Quantifications of normalized thickness of the ventral commissure (VC), ventral funiculus (VF) and

lateral funiculus (LF) from GAD65 labeled *Nrp2<sup>f/f</sup>;FoxA2<sup>+creERT2</sup>* No TM (VF=0.078±0.0042; LF=0.025±0.0021), and *Nrp2<sup>f/f</sup>;FoxA2<sup>+creERT2</sup> +TM* (VF=0.049±0.0048; LF=0.013±0.0013) embryos. Data are means ± SEM from 5-6 sections measured per embryos, where n=3 embryos per genotype. ANOVA followed by post-hoc Tukey test, \*p<0.05 compared to *Nrp2<sup>f/f</sup>;FoxA2<sup>+creERT2</sup>* No TM.

**Supplemental Figure 6.** Specific deletion of *Plexin-A1* in dorsal commissural neurons shows normal pre-crossing, but altered post-crossing, axon guidance. **(A-C)** Representative confocal micrographs of E11.5 mouse spinal cord sections taken from a *PlxnA1<sup>+/+</sup>;Math1-Cre<sup>+</sup>-GFP* **(A)**, *PlxnA1<sup>+/f</sup>;Math1-Cre<sup>+</sup>-GFP* **(B)**, and *PlxnA1<sup>f/f</sup>;Math1-Cre<sup>+</sup>-GFP* littermate embryos **(C)**. All transverse sections were processed for immunocytochemistry for *PlxnA1* (blue), *Robo3.1* (red), and GFP (green). Scale bar for A and B, 225 μm. **(D)** Quantifications of normalized fluorescence in *Robo3.1*-positive pre-crossing axons showed no significant difference between littermates with the following genotypes: *PlxnA1<sup>+/+</sup>;Math1-Cre<sup>+</sup>*, *PlxnA1<sup>+/f</sup>;Math1-Cre<sup>+</sup>-GFP*, and *PlxnA1<sup>f/f</sup>;Math1-Cre<sup>+</sup>-GFP*. Data are means ± SEM from 5-10 sections measured per embryos, where n=5 *PlxnA1<sup>+/+</sup>;Math1-Cre<sup>+</sup>*; n=4 *PlxnA1<sup>+/f</sup>;Math1-Cre<sup>+</sup>-GFP*; n= 3 *PlxnA1<sup>f/f</sup>;Math1-Cre<sup>+</sup>-GFP*. ANOVA, not significant. **(E)** Quantifications of normalized thickness of the ventral commissure (VC), ventral funiculus (VF) and lateral funiculus (LF) from *PlxnA1* labeled *PlxnA1<sup>+/+</sup>;Math1-Cre<sup>+</sup>*; *PlxnA1<sup>+/f</sup>;Math1-Cre<sup>+</sup>-GFP*; and *PlxnA1<sup>f/f</sup>;Math1-Cre<sup>+</sup>-GFP* embryos. Data are means ± SEM from 6-8 sections measured per embryos, where n=3 *PlxnA1<sup>+/+</sup>;Math1-Cre<sup>+</sup>*; and n=5 *PlxnA1<sup>+/f</sup>;Math1-Cre<sup>+</sup>-GFP*; *PlxnA1<sup>f/f</sup>;Math1-Cre<sup>+</sup>-GFP* embryos. ANOVA

followed by post-hoc Tukey test, \* $p < 0.05$  compared to *PlxnA1<sup>+/+</sup>;Math1-cre<sup>+</sup>*. **(F)**

Schematic diagram illustrating wild type (left) and axonal deletion of PlxnA1 (right) genotypes and phenotypes observed in E11.5 spinal cords.

**Supplemental Figure 7.** Plexin-A1 null mutant embryos have normal pre-crossing axonal pathfinding.

**(A-B)** Confocal images show E11.5 wild type mouse spinal cord **(A)** and Plexin-A1 homozygote null mutant (*PlxnA1<sup>-/-</sup>*) spinal cord **(B)**. Both sections were processed for immunohistochemistry for Nrp2 (red), Robo3.1 (blue) and TAG1 (green). Scale bar, 160  $\mu\text{m}$ .

| Genotype                                                                                         | Normalized Fluorescence |                 |                 |                 | Normalized Ventral Commissure Thickness |                    |                    |                     | Normalized Ventral Funiculus Thickness |                     | Normalized Lateral Funiculus Thickness |                    |
|--------------------------------------------------------------------------------------------------|-------------------------|-----------------|-----------------|-----------------|-----------------------------------------|--------------------|--------------------|---------------------|----------------------------------------|---------------------|----------------------------------------|--------------------|
|                                                                                                  | Nrp2                    | Robo3.1         | TAG1            | GAD65           | Nrp2                                    | Robo3.1            | GAD65              | PlexinA1            | GAD65                                  | PlexinA1            | GAD65                                  | PlexinA1           |
| <i>Nrp2<sup>fl/fl</sup>;FoxA2<sup>+/-</sup>/CreERT<sup>2</sup></i><br>(No TM)                    | 11.89<br>± 0.72         | 11.57 ±<br>0.57 | 3.26 ±<br>0.37  | 14.48±<br>1.06  | 0.0614<br>±<br>0.0015                   | 0.047 ±<br>0.0015  | 0.056 ±<br>0.0021  | -                   | 0.078 ±<br>0.0042                      | -                   | 0.025 ±<br>0.0021                      | -                  |
| <i>Nrp2<sup>fl/fl</sup>;FoxA2<sup>+/-</sup>/CreERT<sup>2</sup></i><br>(+TM)                      | 7.52 ±<br>0.50*         | 8.87 ±<br>0.51* | 1.38 ±<br>0.14* | 7.66 ±<br>1.20* | 0.0452<br>±<br>0.0022*                  | 0.033 ±<br>0.0021* | 0.040 ±<br>0.0032* | -                   | 0.049 ±<br>0.0048*                     | -                   | 0.013 ±<br>0.0013*                     | -                  |
| <i>Nrp2<sup>fl/fl</sup>;FoxA2<sup>CreERT2/CreERT2</sup></i><br>(+TM)                             | 8.16 ±<br>0.50*         | -               | 1.86 ±<br>0.16* | -               | 0.0243<br>±<br>0.0014*                  | 0.016 ±<br>0.0011* | -                  | -                   | -                                      | -                   | -                                      | -                  |
| <i>Nrp2<sup>+/+</sup>;Math1-Cre<sup>+</sup></i>                                                  | -                       | 7.48 ±<br>0.42  | -               | -               | -                                       | -                  | -                  | -                   | -                                      | -                   | -                                      | -                  |
| <i>Nrp2<sup>+/+</sup>;Math1:Cre<sup>+</sup></i>                                                  | -                       | 7.97 ±<br>0.69  | -               | -               | -                                       | -                  | -                  | -                   | -                                      | -                   | -                                      | -                  |
| <i>PlxnA1<sup>+/-</sup>;Math1-Cre<sup>+</sup></i>                                                | -                       | 5.48 ±<br>0.39  | -               | -               | -                                       | -                  | -                  | 0.0793 ±<br>0.0027  | -                                      | 0.0886 ±<br>0.0031  | -                                      | 0.0315 ±<br>0.0017 |
| <i>PlxnA1<sup>+/+</sup>;Math1-Cre<sup>+</sup></i>                                                | -                       | 5.65 ±<br>0.32  | -               | -               | -                                       | -                  | -                  | 0.05392±<br>0.0045* | -                                      | 0.0724 ±<br>0.0033* | -                                      | 0.0248 ±<br>0.0019 |
| <i>PlxnA1<sup>+/+</sup>;Math1-Cre<sup>+</sup></i>                                                | -                       | 6.47 ±<br>0.4   | -               | -               | -                                       | -                  | -                  | 0.0626 ±<br>0.0018* | -                                      | 0.0693 ±<br>0.0013* | -                                      | 0.0206 ±<br>0.0009 |
| <i>Nrp2<sup>+/+</sup>;FoxA2<sup>+/-</sup>;PlxnA1<sup>+/-</sup></i><br>(+TM)                      | -                       | 4.78 ±<br>0.28  | -               | -               | -                                       | 0.0640 ±<br>0.002  | -                  | -                   | -                                      | -                   | -                                      | -                  |
| <i>Nrp2<sup>fl/fl</sup>;FoxA2<sup>+/-</sup>/CreERT<sup>2</sup>;PlxnA1<sup>+/-</sup></i><br>(+TM) | -                       | 3.30 ±<br>0.3 * | -               | -               | -                                       | 0.0511 ±<br>0.001* | -                  | -                   | -                                      | -                   | -                                      | -                  |
| <i>Nrp2<sup>fl/fl</sup>;FoxA2<sup>CreERT2/CreERT2</sup>;PlxnA1<sup>-/-</sup></i><br>(+TM)        | -                       | 5.73 ±<br>0.44  | -               | -               | -                                       | 0.0455 ±<br>0.002* | -                  | -                   | -                                      | -                   | -                                      | -                  |

\*Statistical significance compared to respective controls

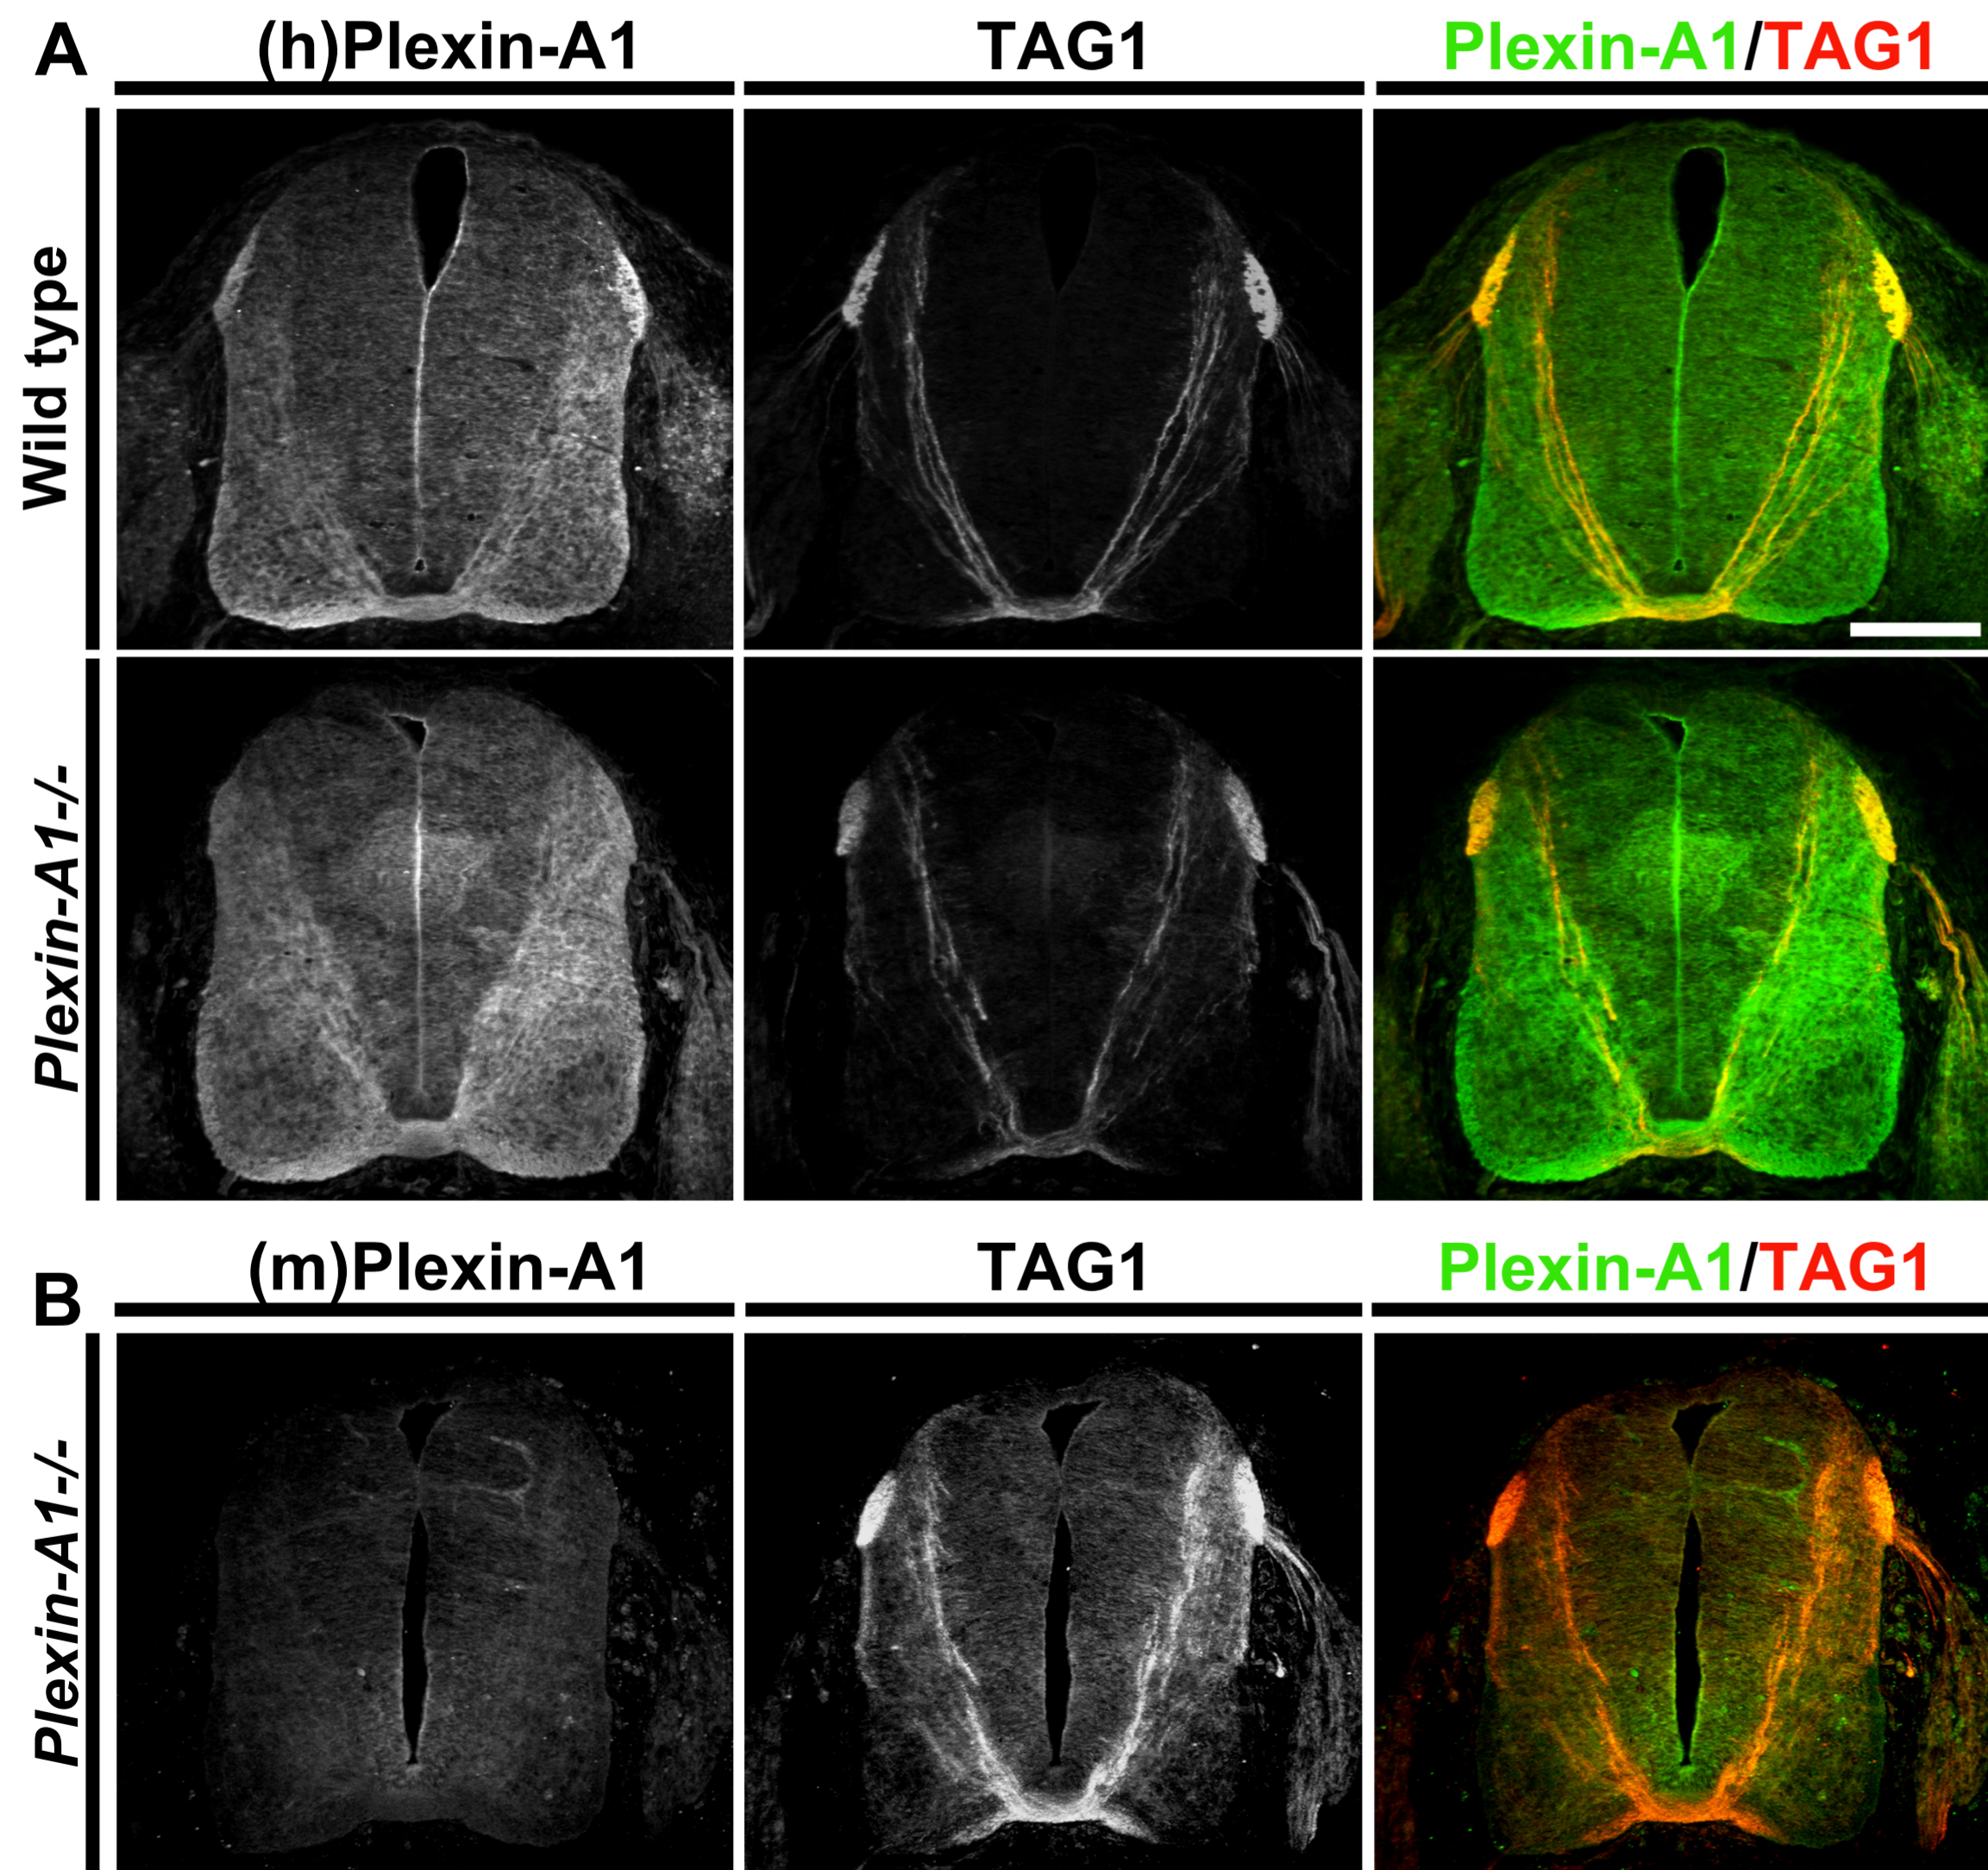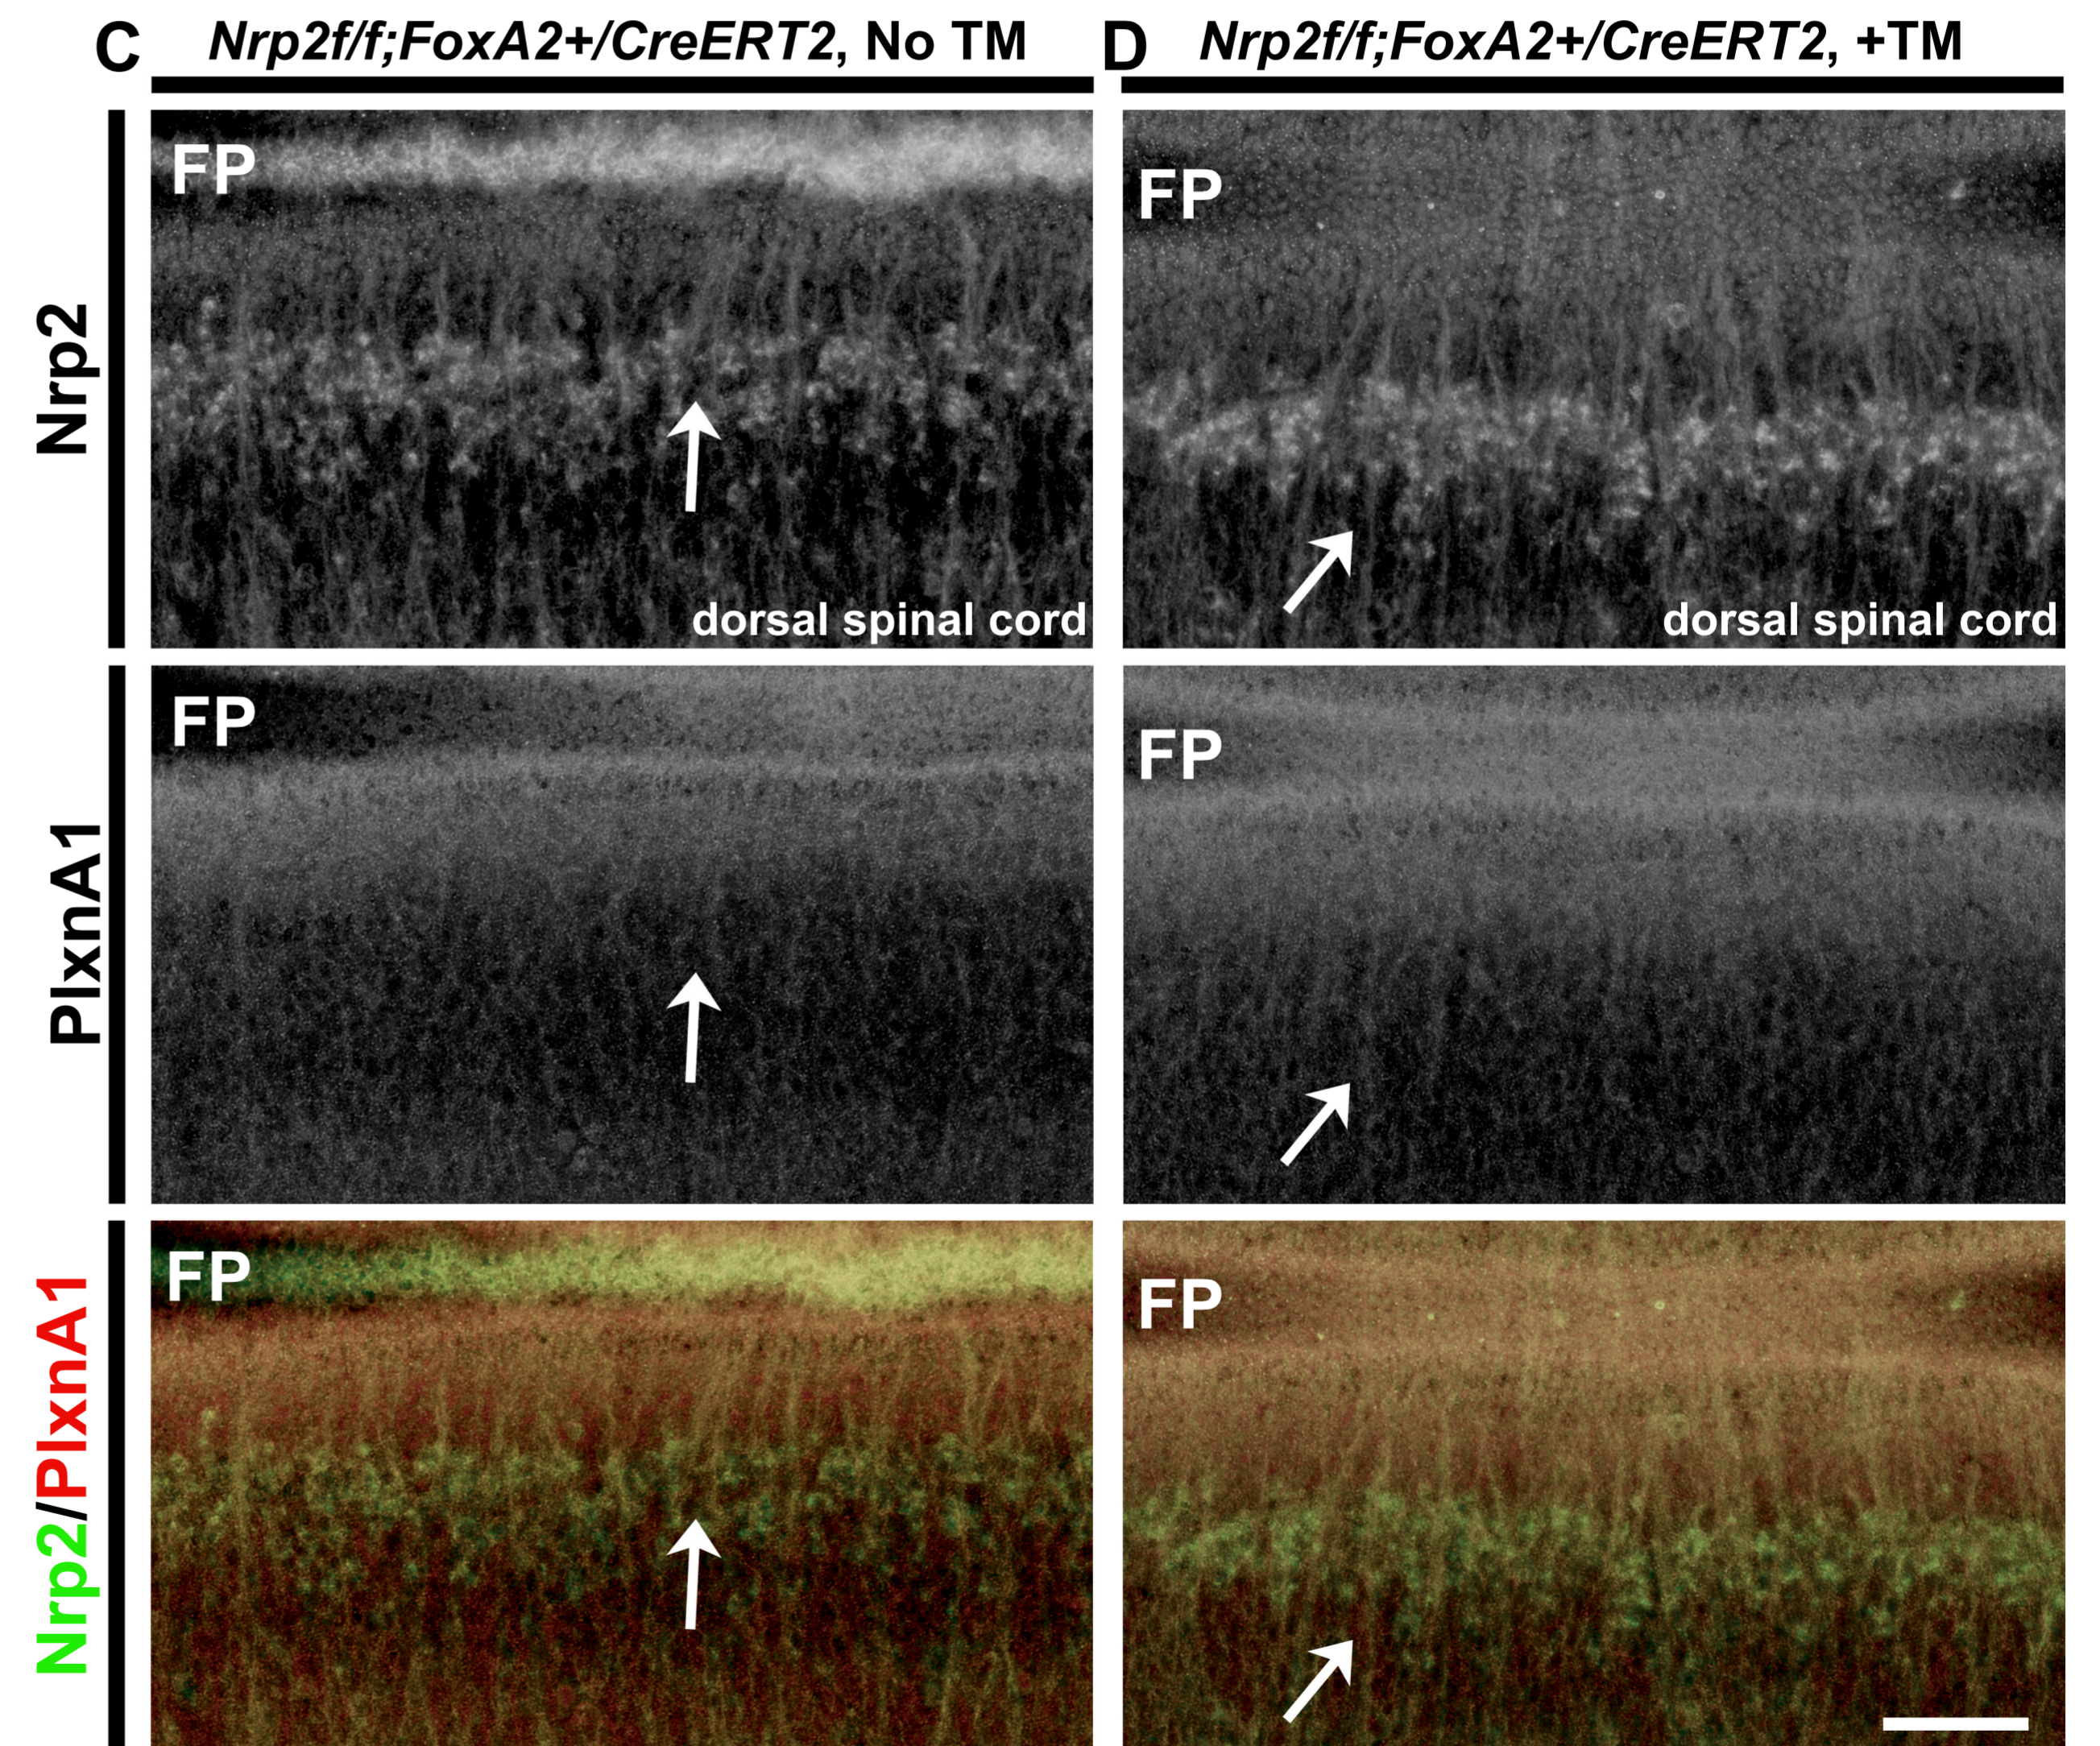



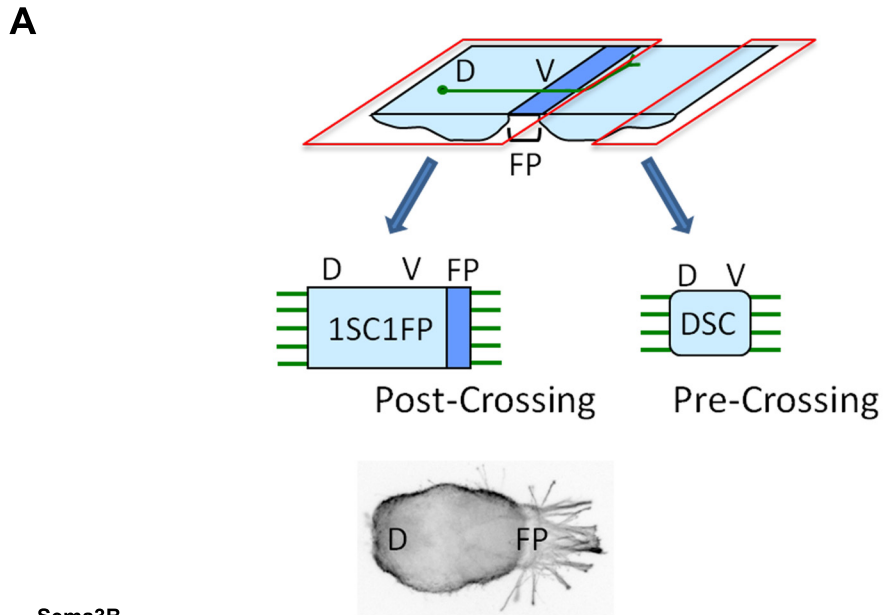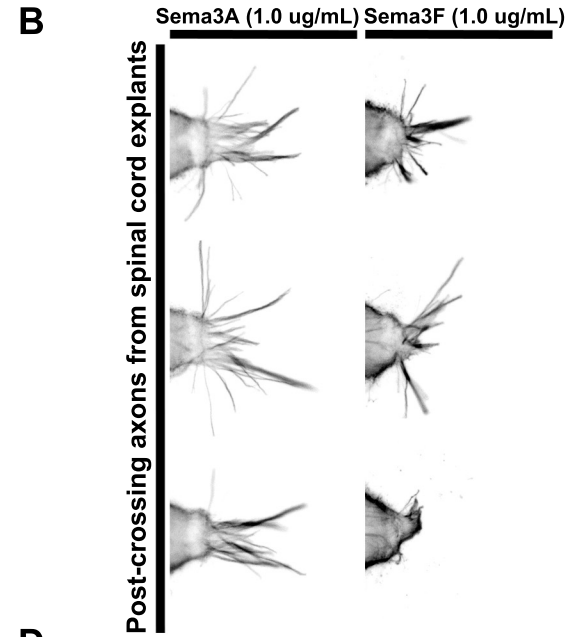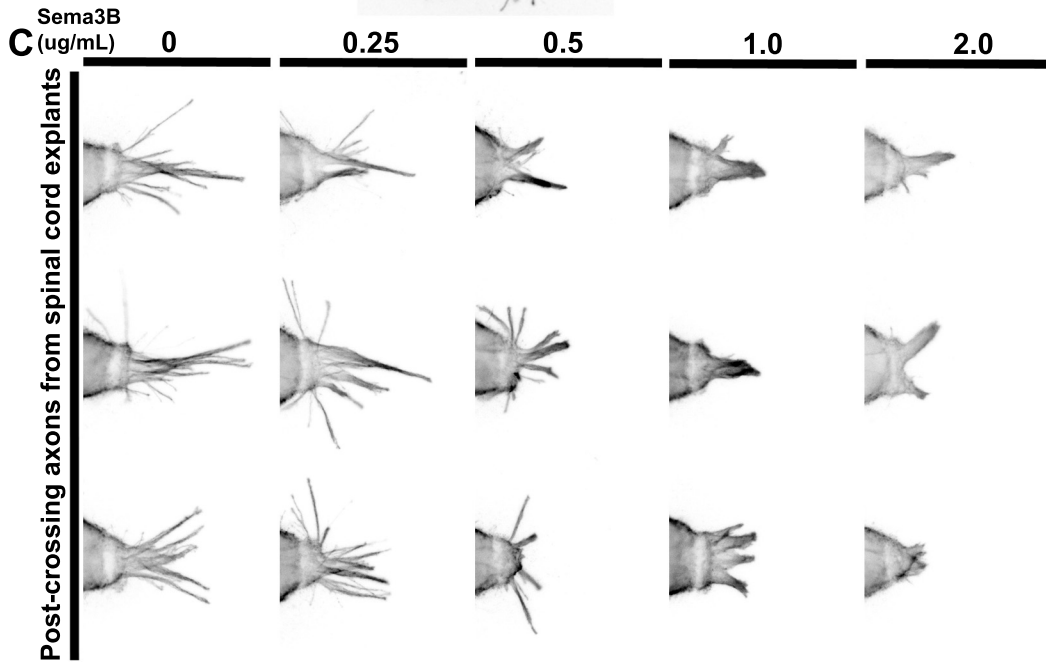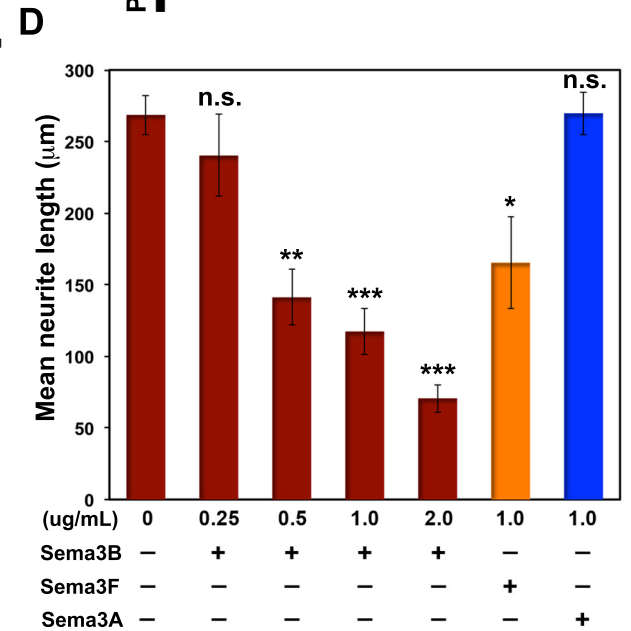

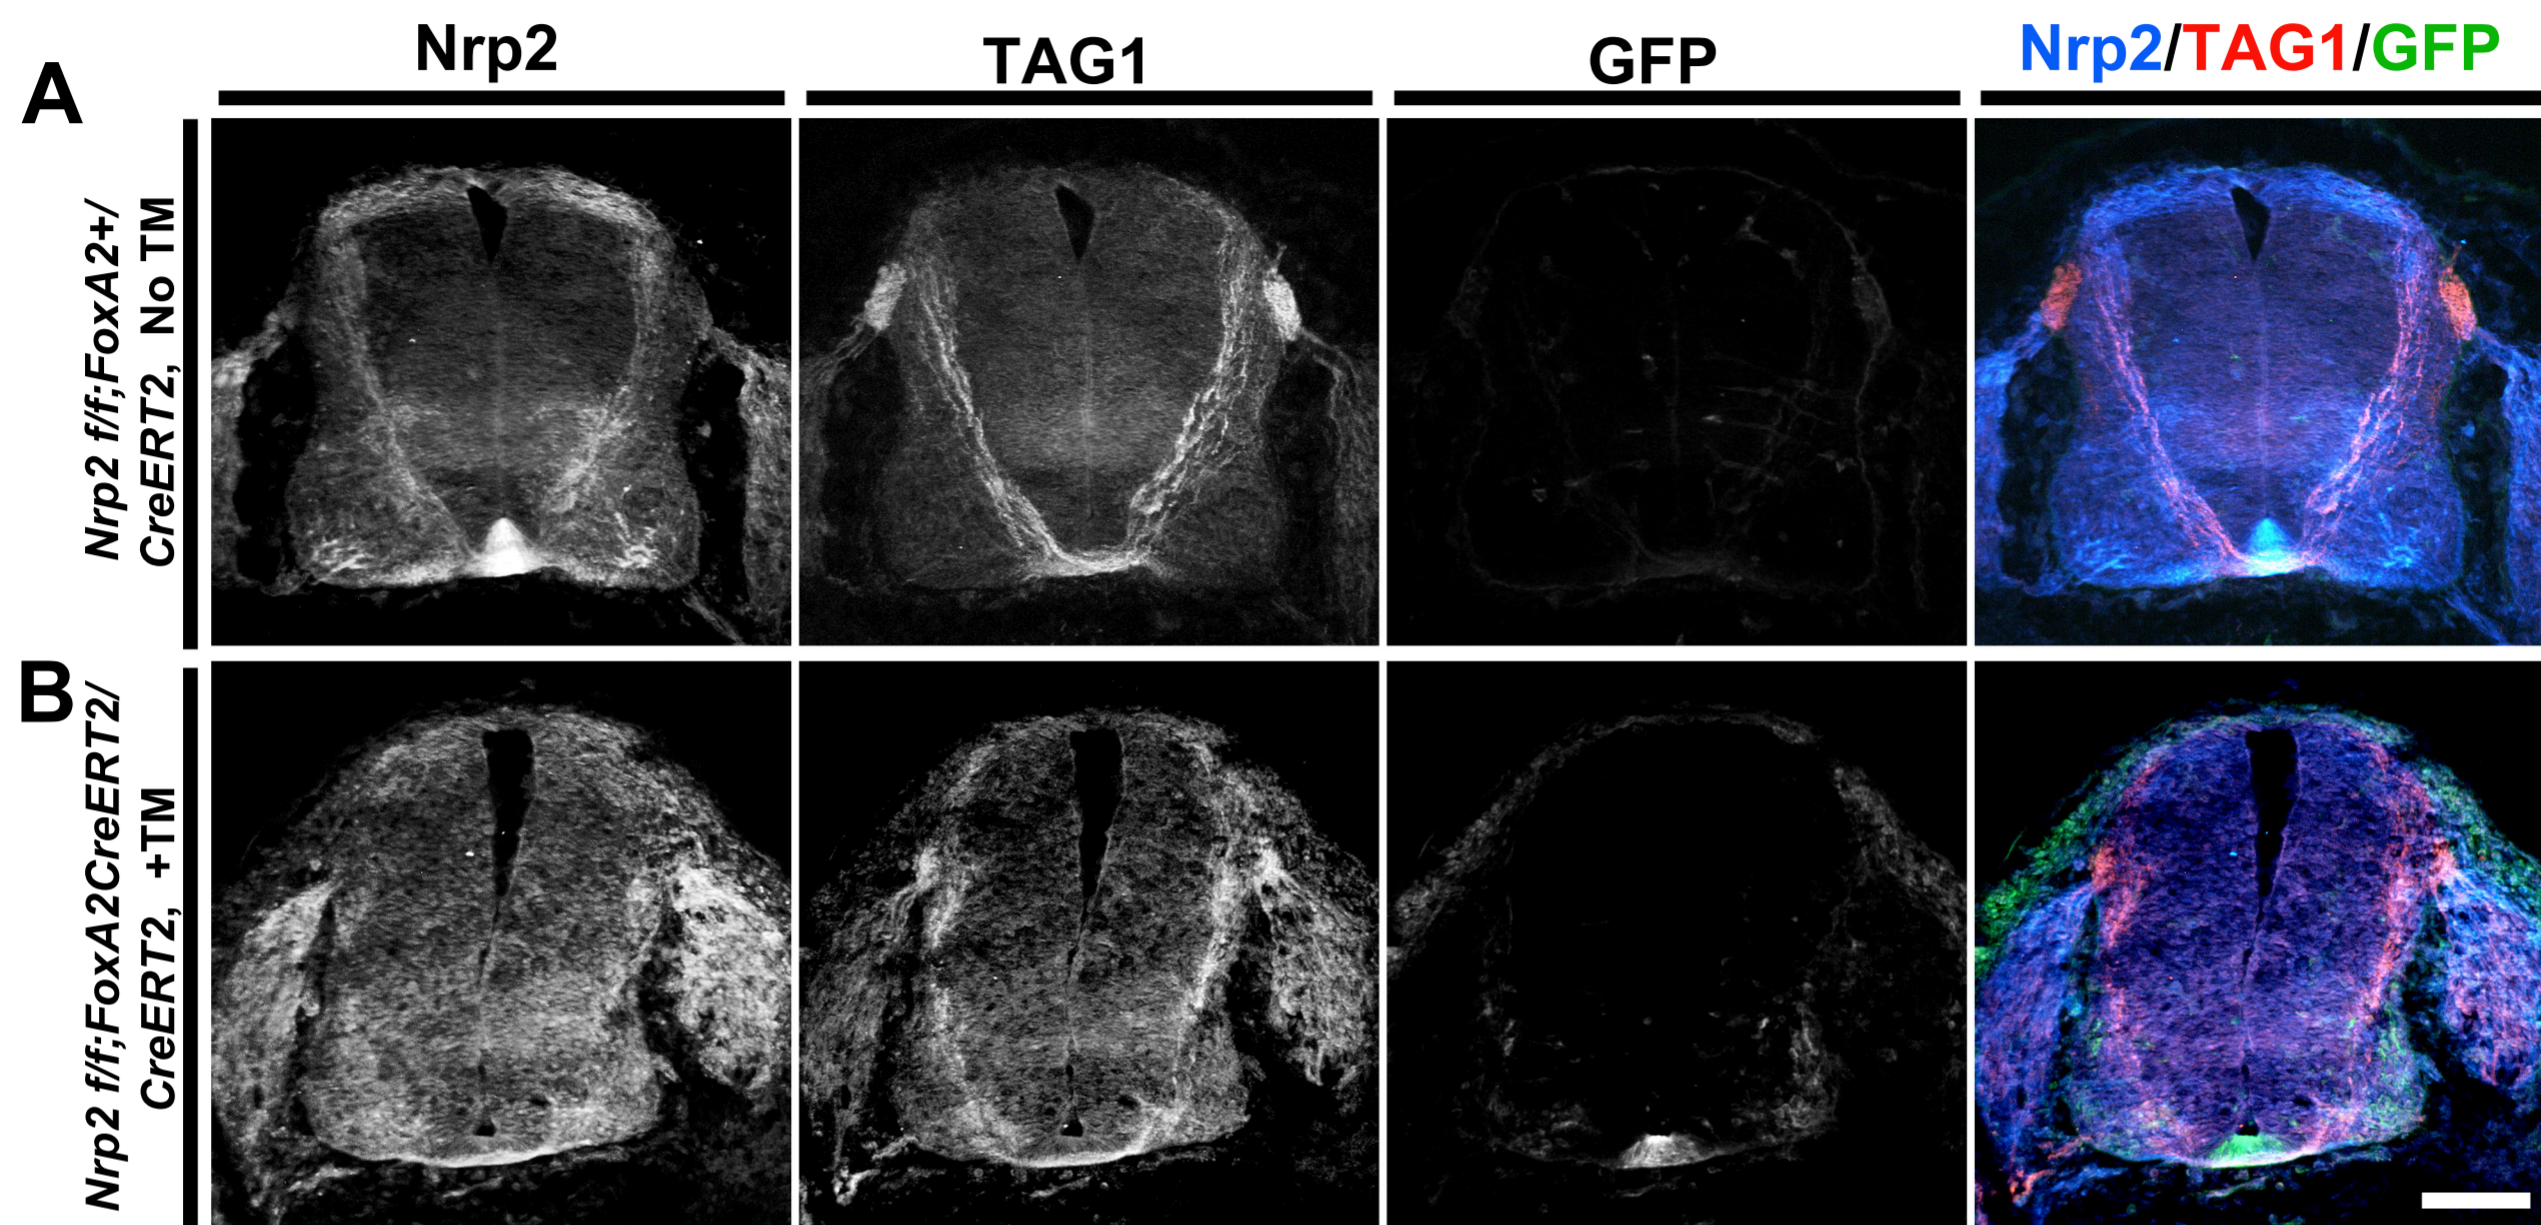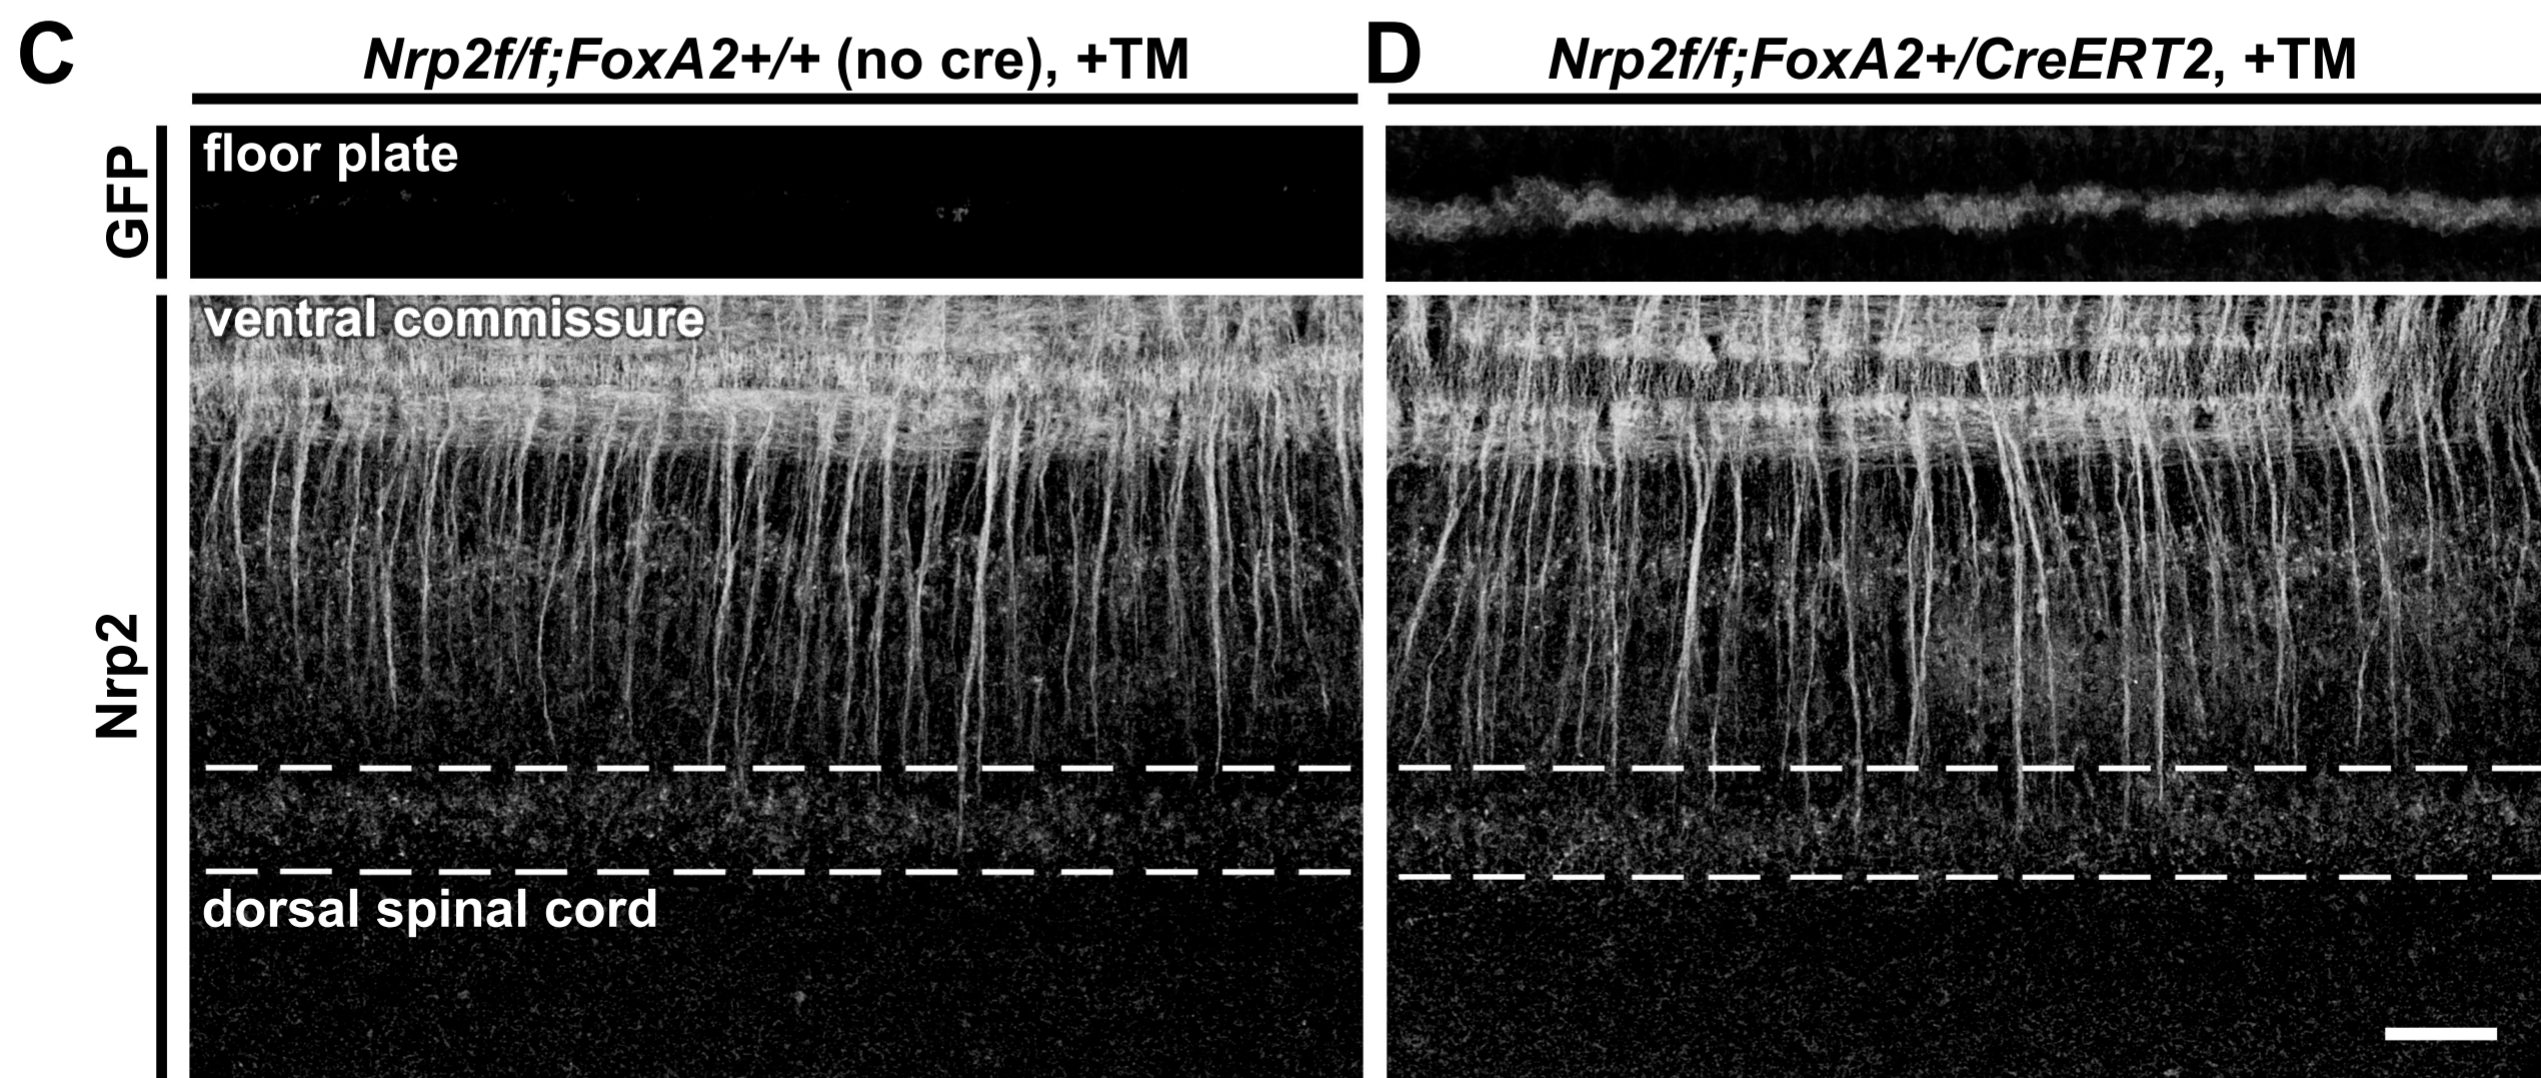

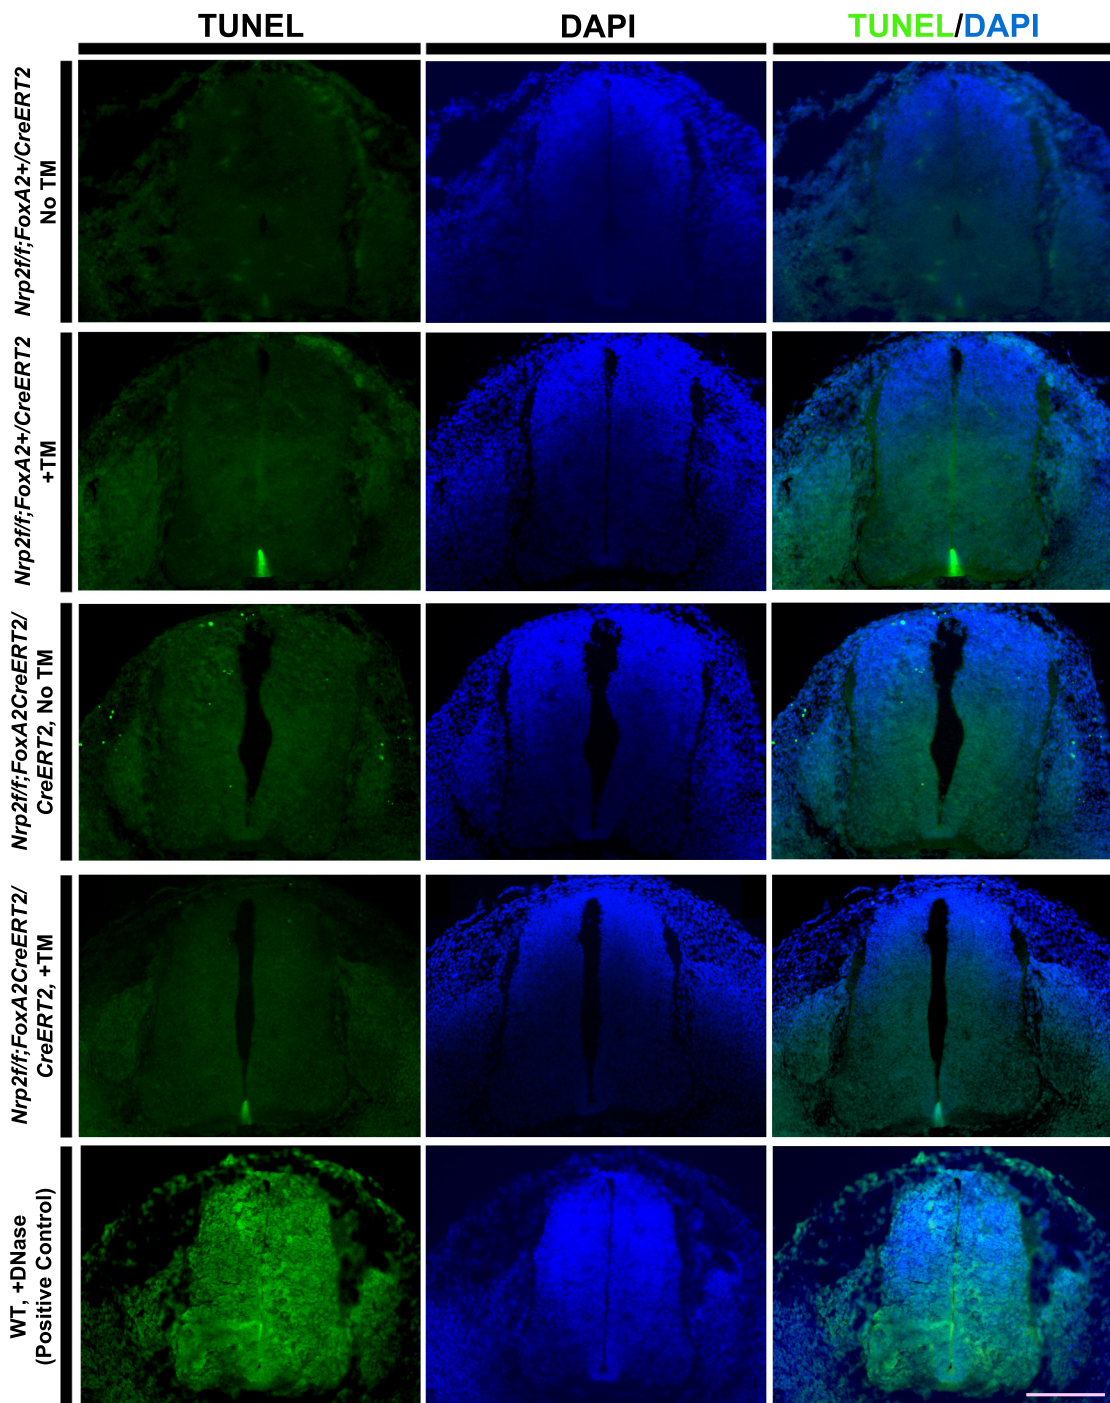

# Hernandez-Enriquez\_Supplemental Fig 5

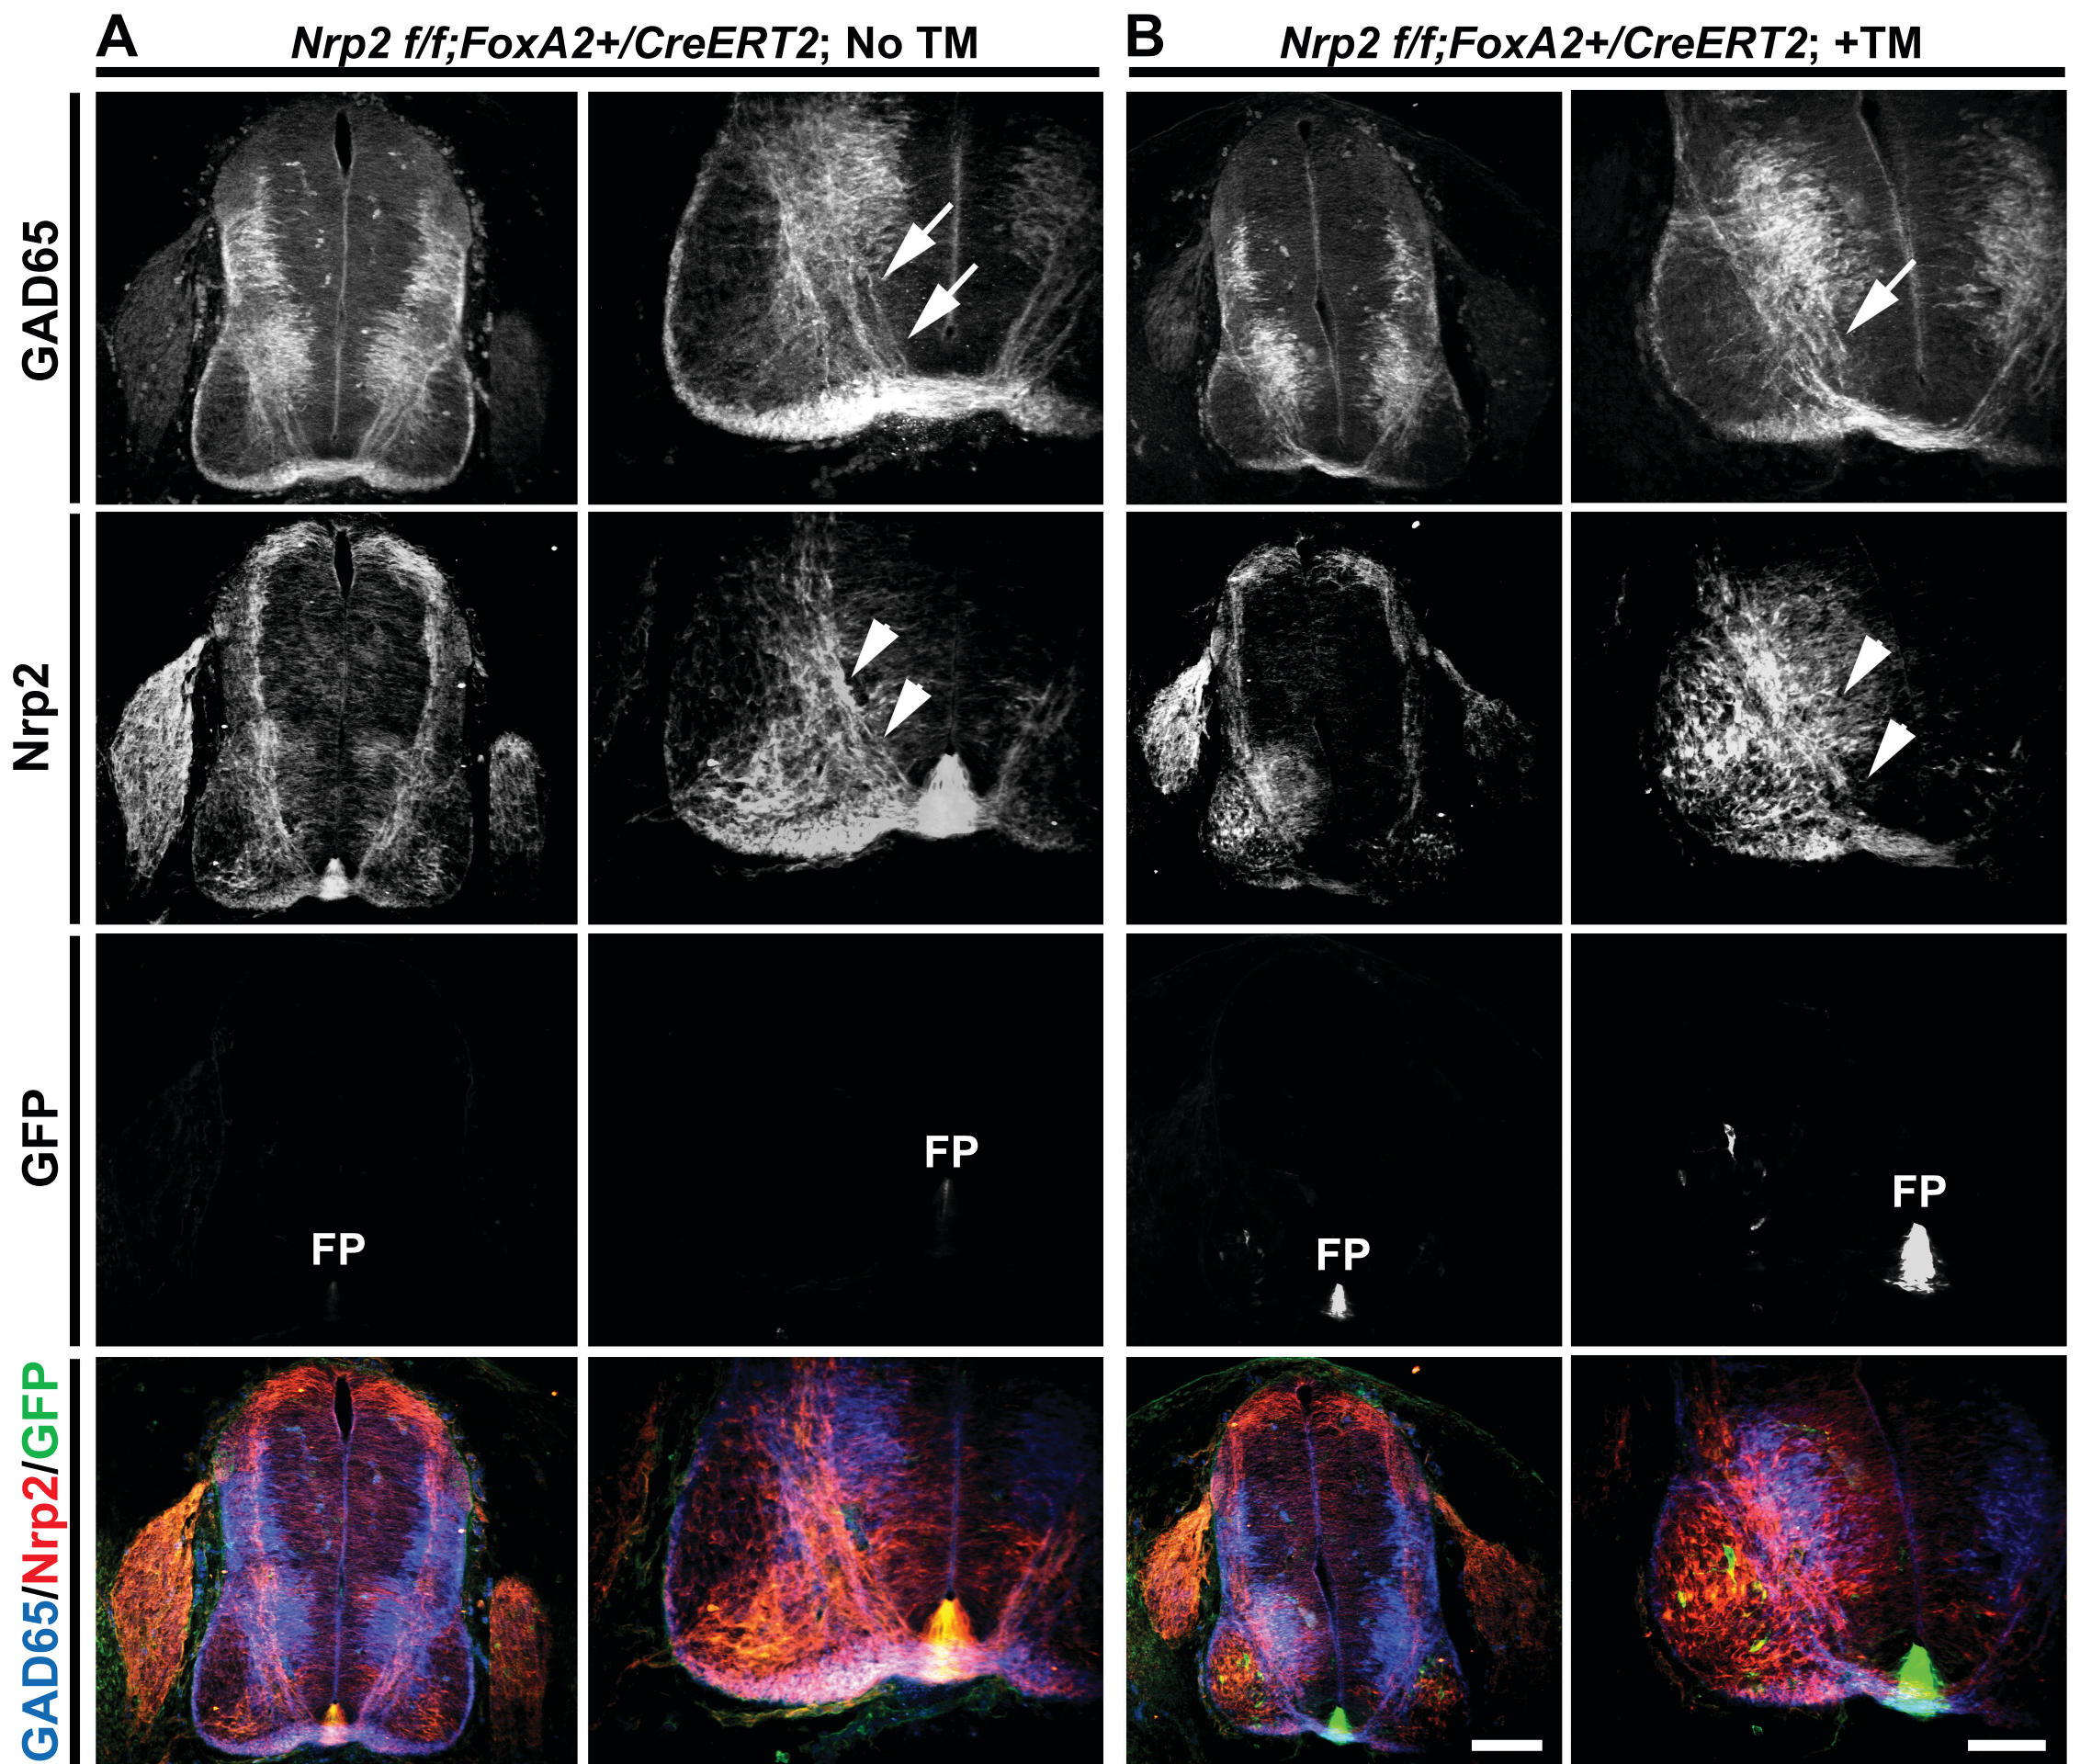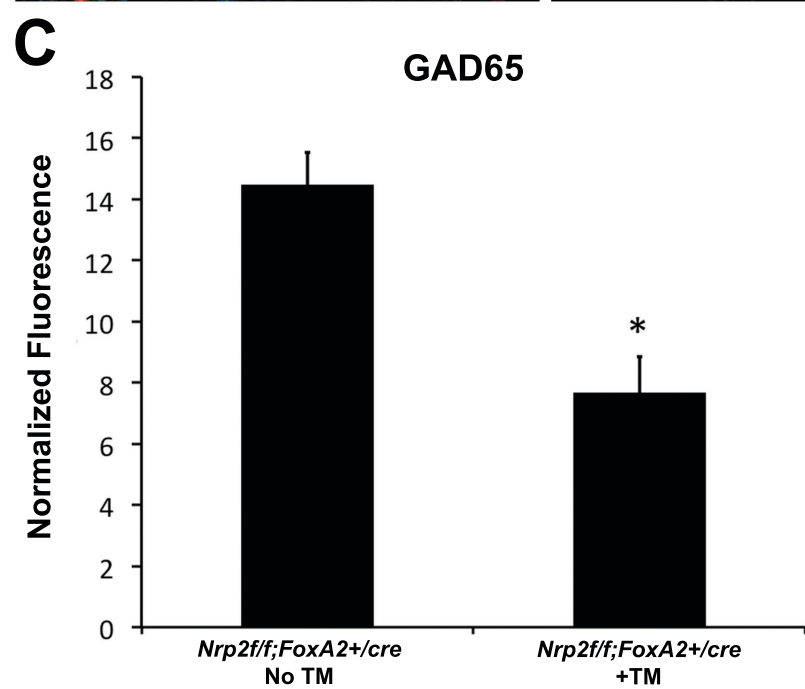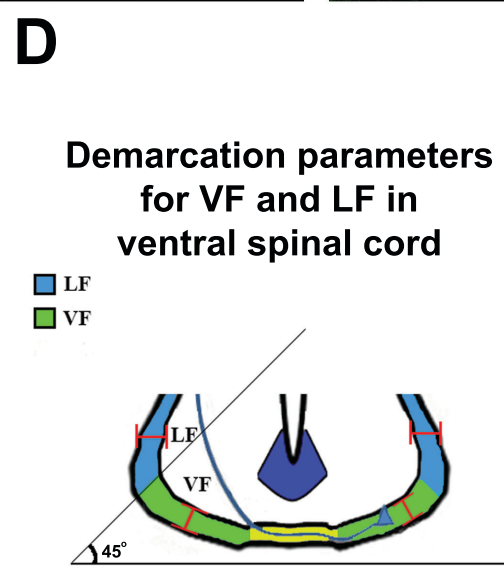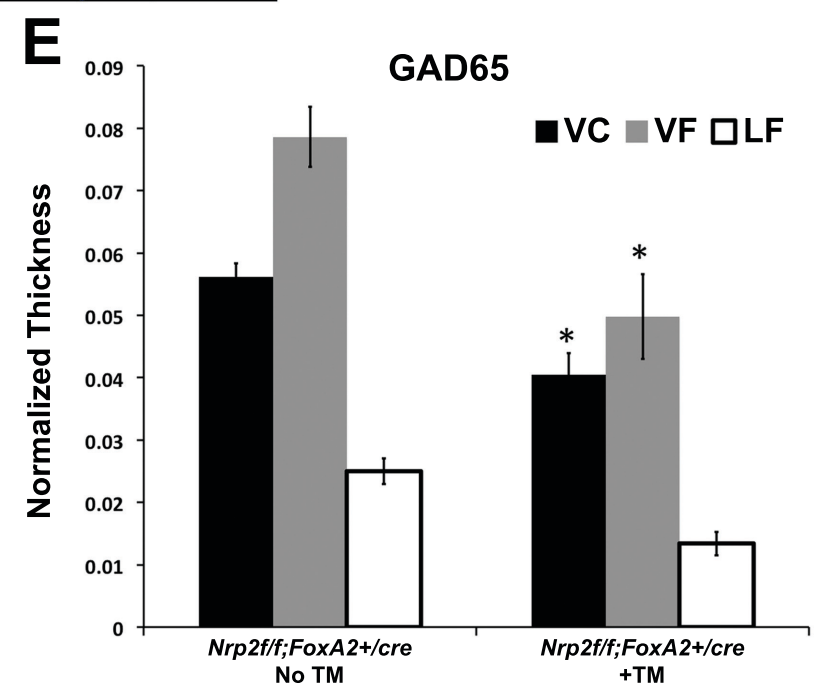

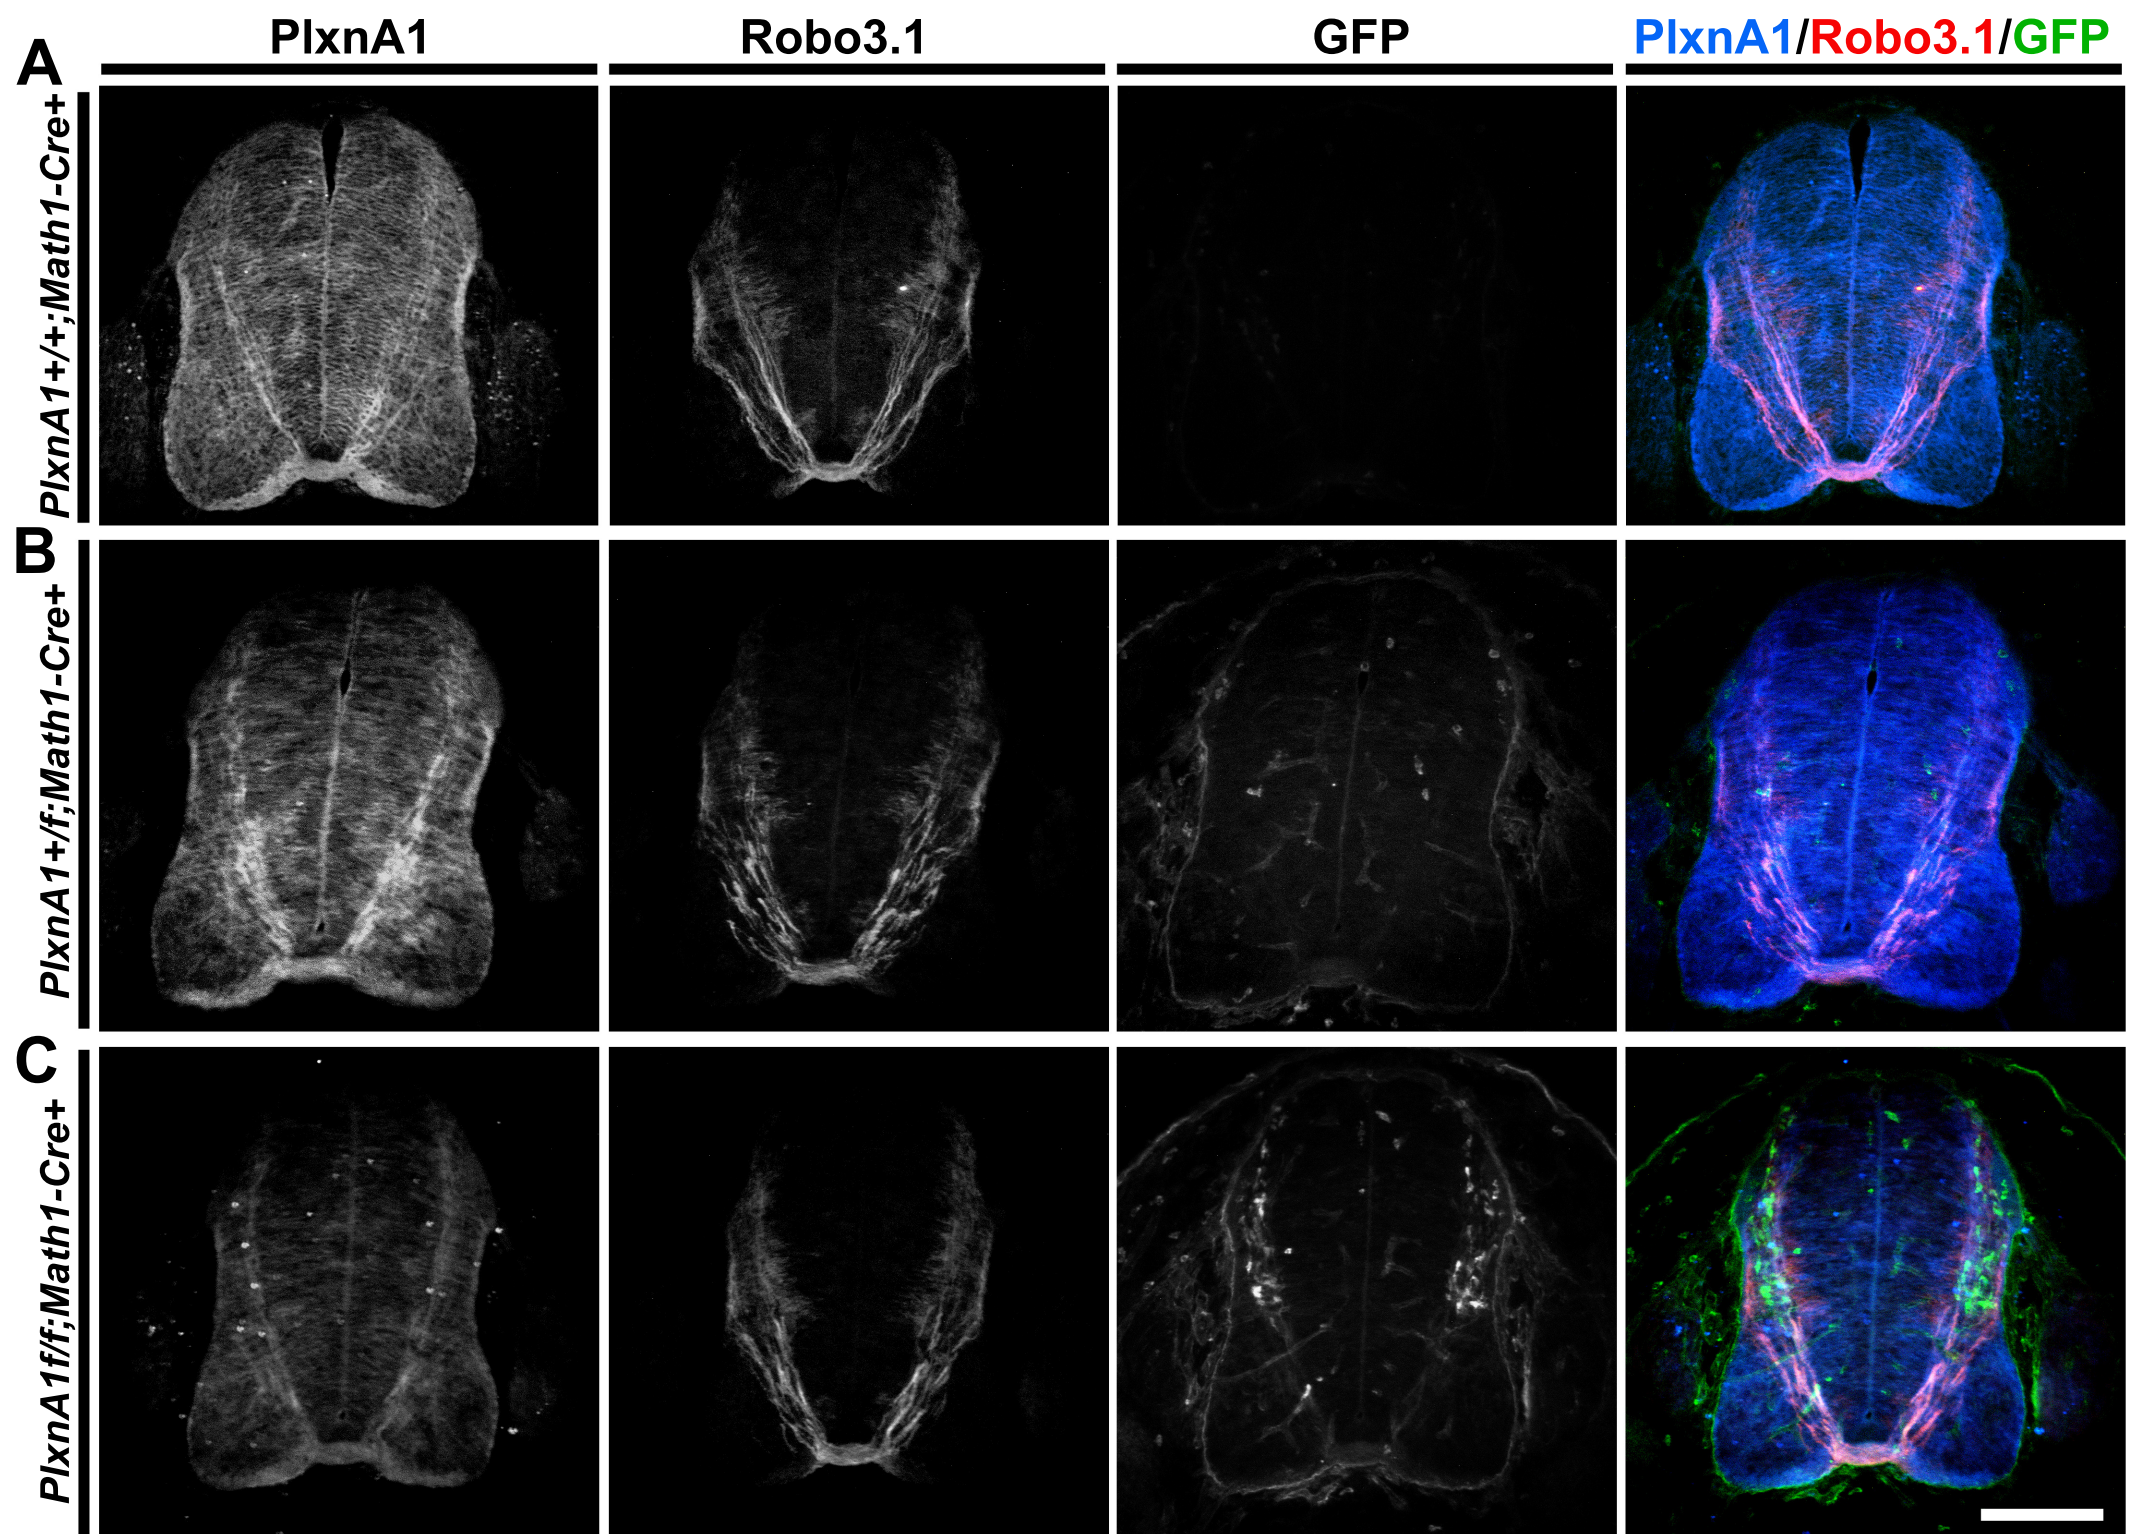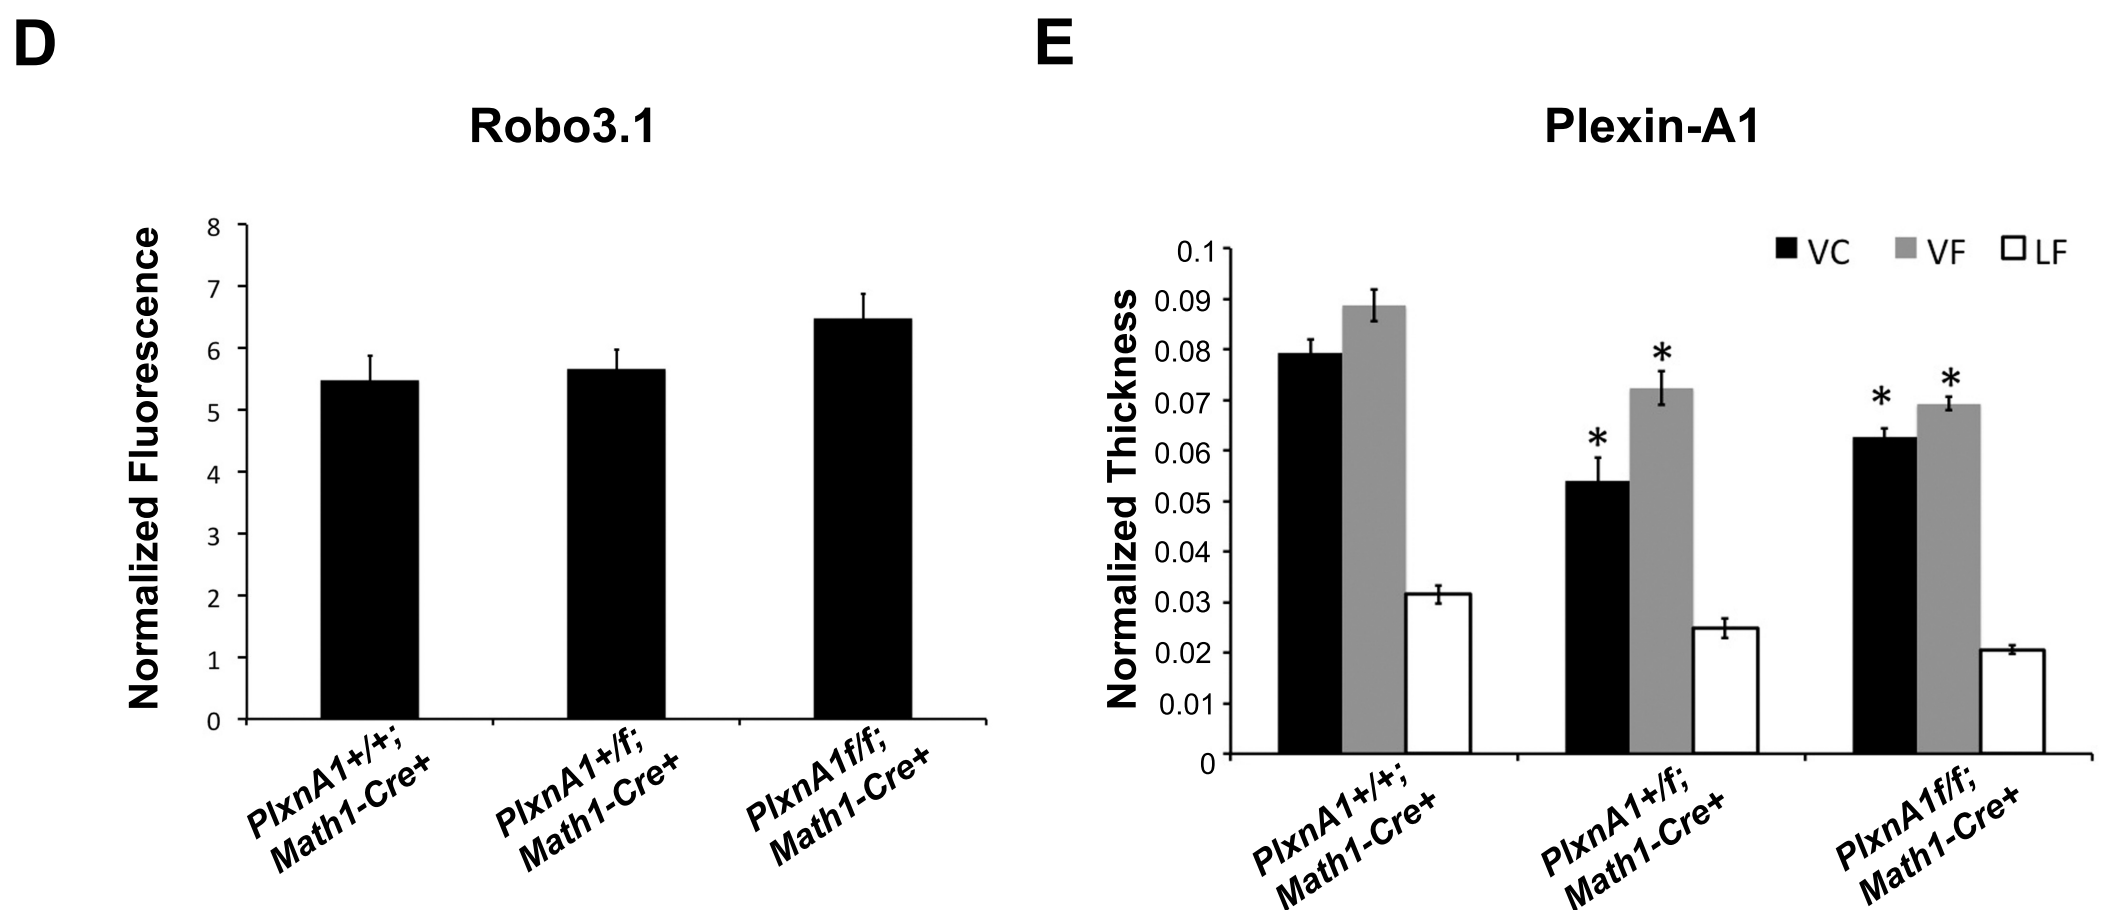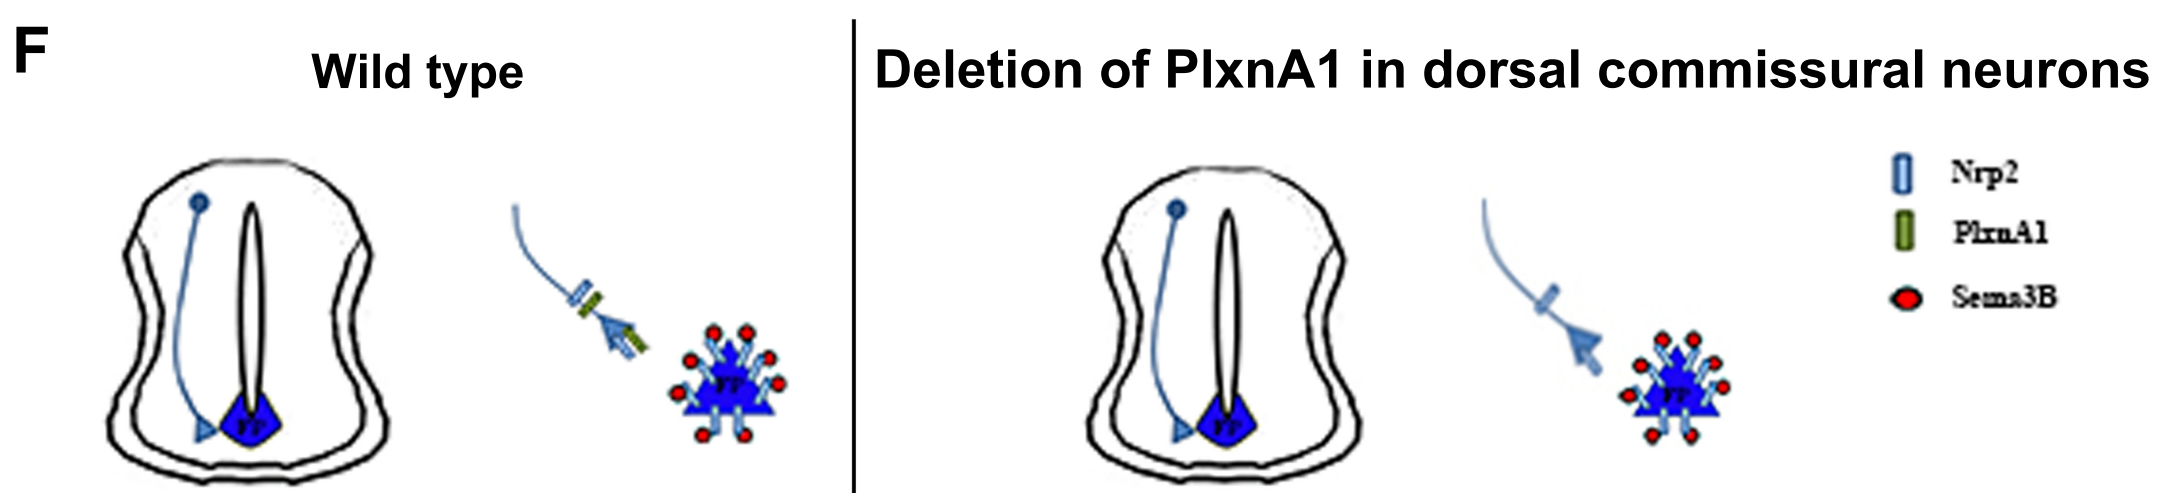

Robo3.1

Nrp2

TAG1

Robo3.1/Nrp2/TAG1

**A**

Wild type

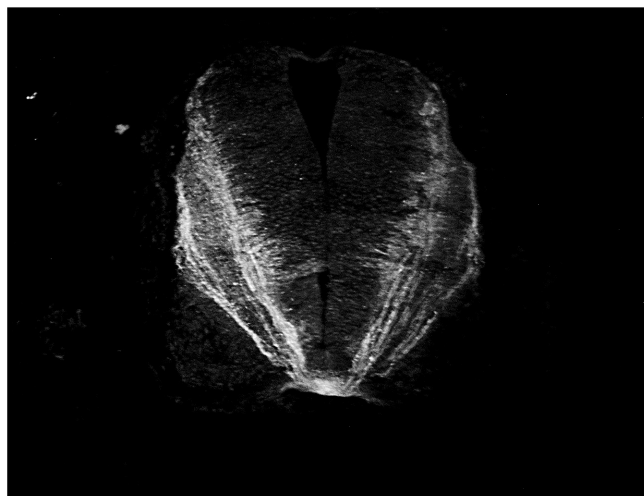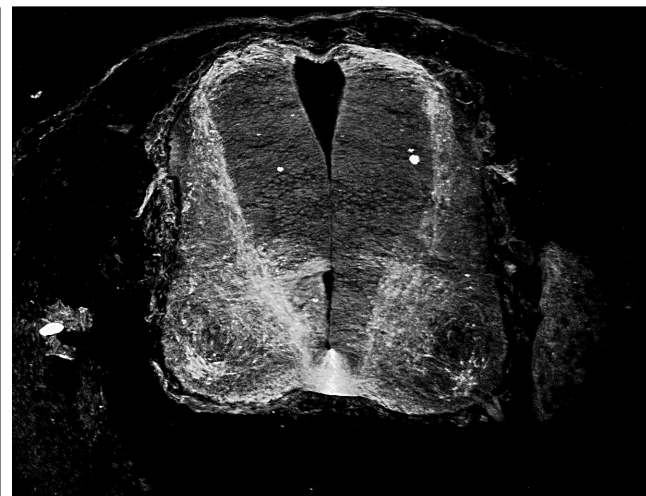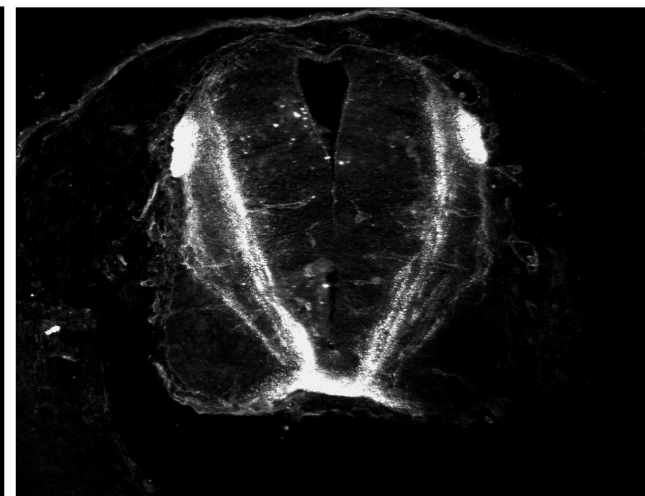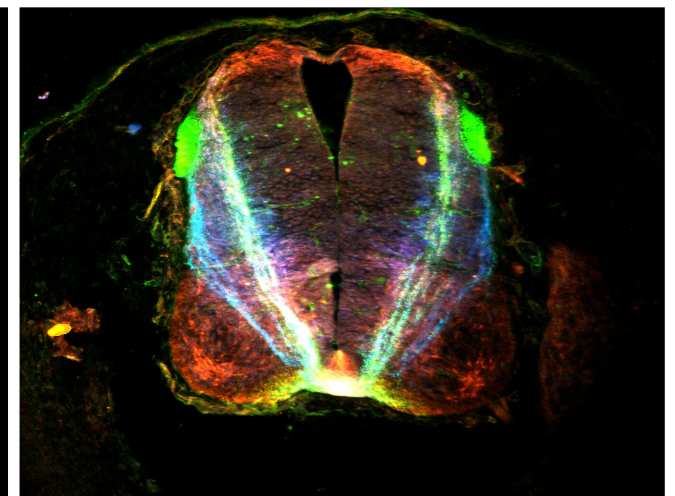

**B**

*Plexin-A1*<sup>-/-</sup>

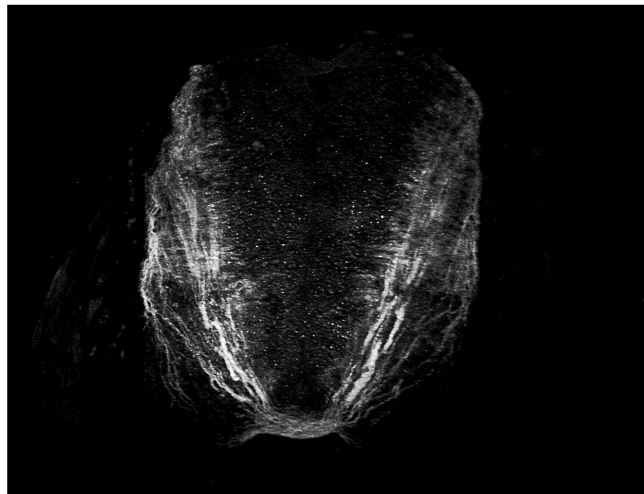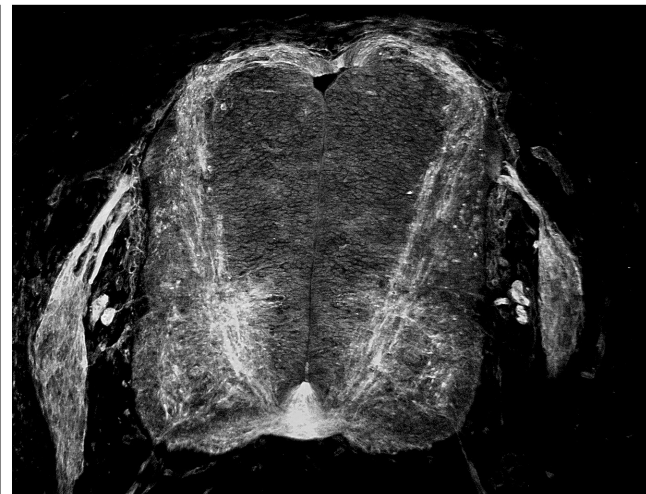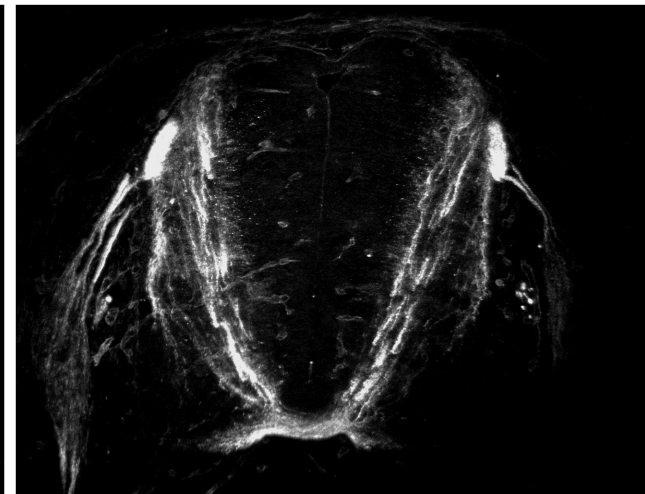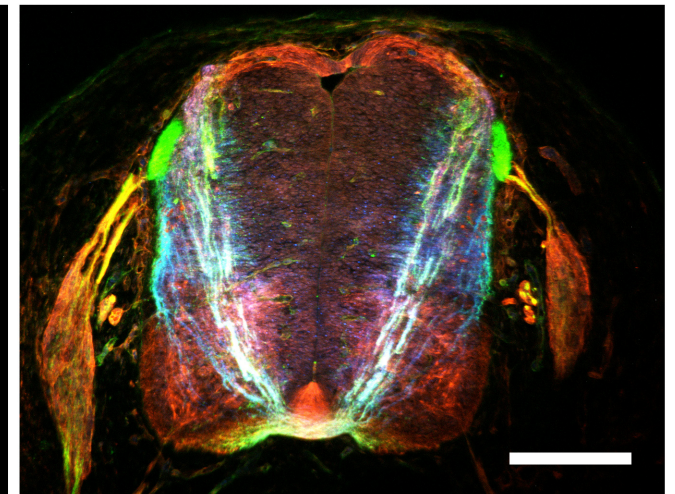

Supplement: supp_29.24.2617_Supplemental_Material.pdf [file supp_29.24.2617_Supplemental_Material.pdf]
